# Supplementary material for: A systematic review of genetic mutations in pulmonary arterial hypertension
Source: BMC Med Genet. 2017 Aug 2;18:82. doi: 10.1186/s12881-017-0440-5 (PMC5541665; doi:10.1186/s12881-017-0440-5)
Supplement: Additional file 1: — “Table S1-Mutations Per Gene.xlsx” contains the list of curated mutations including those not present in ClinVar. (XLSX 92 kb) [file 12881_2017_440_MOESM1_ESM.xlsx]

## Sheet: table-mutations-per-gene
Gene	Position	Mutation	Classification	Transcript	Clinical Significance	Phenotype	Exon	Citation (if included in ClinVar)	Mutation ID
ACVRL1	237	-46C>G	single nucleotide variant	NM_000020.2(ACVRL1):c.-46C>G	Benign	not specified	0		ClinVar=212792
ACVRL1	278	-5-33C>T	single nucleotide variant	NM_000020.2(ACVRL1):c.-5-33C>T	Benign	not specified	0		ClinVar=136292
ACVRL1	371	88C>T	single nucleotide variant	NM_000020.2(ACVRL1):c.88C>T (p.Pro30Ser)	Likely benign	Haemorrhagic telangiectasia 2	3		ClinVar=161202
ACVRL1	490	207C>T	single nucleotide variant	NM_000020.2(ACVRL1):c.207C>T (p.Cys69=)	Likely benign	Osler hemorrhagic telangiectasia syndrome	3		ClinVar=309440
ACVRL1	596	313+40G>C	single nucleotide variant	NM_000020.2(ACVRL1):c.313+40G>C	Benign	Hereditary hemorrhagic telangiectasia type 2	3		ClinVar=416700
ACVRL1	596	313+11C>T	single nucleotide variant	NM_000020.2(ACVRL1):c.313+11C>T	Benign	Osler hemorrhagic telangiectasia syndrome	3		ClinVar=136293
ACVRL1	596	c.313+20C>A	single nucleotide variant	c.313+20C>A	Pathogenic	Primary pulmonary hypertension	3	PMID: 25543221	Manual Annotation
ACVRL1	597	314-35A>G	single nucleotide variant	NM_000020.2(ACVRL1):c.314-35A>G	Benign	not specified	4		ClinVar=254710
ACVRL1	613	330G>A	single nucleotide variant	NM_000020.2(ACVRL1):c.330G>A (p.Ser110=)	Benign	Hereditary hemorrhagic telangiectasia type 2	4		ClinVar=212791
ACVRL1	885	c.602A > G	single nucleotide variant	c.602A > G	Pathogenic	Primary pulmonary hypertension	5	PMID: 20056902	Manual Annotation
ACVRL1	909	626-59delG	Deletion	NM_000020.2(ACVRL1):c.626-59delG	Likely benign	Hereditary hemorrhagic telangiectasia type 2	6		ClinVar=220940
ACVRL1	925	642C>T	single nucleotide variant	NM_000020.2(ACVRL1):c.642C>T (p.Gly214=)	Likely benign	not specified	6		ClinVar=254711
ACVRL1	1030	747G>A	single nucleotide variant	NM_000020.2(ACVRL1):c.747G>A (p.Val249=)	Benign	Hereditary hemorrhagic telangiectasia type 2	6		ClinVar=212793
ACVRL1	1055	772+6G>A	single nucleotide variant	NM_000020.2(ACVRL1):c.772+6G>A	Likely benign	not specified	6		ClinVar=389037
ACVRL1	1055	772+27G>C	single nucleotide variant	NM_000020.2(ACVRL1):c.772+27G>C	Benign	not specified	6		ClinVar=254712
ACVRL1	1219	936C>G	single nucleotide variant	936C>G	Pathogenic	Primary pulmonary hypertension	7	PMID: 20056902	Manual Annotation
ACVRL1	1233	c.950 T > C	single nucleotide variant	c.950 T > C	Pathogenic	Primary pulmonary hypertension	7	PMID: 23298310	Manual Annotation
ACVRL1	1405	1122G>T	single nucleotide variant	NM_000020.2(ACVRL1):c.1122G>T (p.Arg374=)	Benign	Hereditary hemorrhagic telangiectasia type 2	8		ClinVar=416701
ACVRL1	1414	1131A>G	single nucleotide variant	NM_000020.2(ACVRL1):c.1131A>G (p.Ala377=)	Benign	Hereditary hemorrhagic telangiectasia type 2	8		ClinVar=254706
ACVRL1	1425	1142T>C	single nucleotide variant	1142T>C	Pathogenic	Primary pulmonary hypertension	8	PMID: 20056902	Manual Annotation
ACVRL1	1479	c.1196G > T	single nucleotide variant	c.1196G > T	Pathogenic	Primary pulmonary hypertension	8	PMID: 20056902	Manual Annotation
ACVRL1	1529	1246+9C>T	single nucleotide variant	NM_000020.2(ACVRL1):c.1246+9C>T	Benign	Hereditary hemorrhagic telangiectasia type 2	8		ClinVar=254708
ACVRL1	1529	1246+19C>T	single nucleotide variant	NM_000020.2(ACVRL1):c.1246+19C>T	Benign	Hereditary hemorrhagic telangiectasia type 2	8		ClinVar=254707
ACVRL1	1530	1247-15A>G	single nucleotide variant	NM_000020.2(ACVRL1):c.1247-15A>G	Likely benign	not specified	9		ClinVar=379523
ACVRL1	1553	1270C>A	single nucleotide variant	1270C>A	Pathogenic	Primary pulmonary hypertension	9	PMID: 20056902	Manual Annotation
ACVRL1	1563	c.1280A>T	single nucleotide variant	c.1280A>T	Pathogenic	Primary pulmonary hypertension	9	PMID: 20056902	Manual Annotation
ACVRL1	1607	c.1324G > A	single nucleotide variant	c.1324G > A	Pathogenic	Primary pulmonary hypertension	9	PMID: 20056902	Manual Annotation
ACVRL1	1660	1377+45T>C	single nucleotide variant	NM_000020.2(ACVRL1):c.1377+45T>C	Likely benign	not specified	9		ClinVar=254709
ACVRL1	1671	c.1388 del	Deletion	c.1388 del	Pathogenic	Primary pulmonary hypertension	10	PMID: 21651515	Manual Annotation
ACVRL1	1671	c.1388delG	Deletion	c.1388delG	Pathogenic	Primary pulmonary hypertension	10	PMID: 21651515	Manual Annotation
ACVRL1	1673	c.1390 del	Deletion	c.1390 del	Pathogenic	Primary pulmonary hypertension	10	PMID: 21651515	Manual Annotation
ACVRL1	1719	1436G>A	single nucleotide variant	1436G>A	Pathogenic	Primary pulmonary hypertension	10	PMID: 20056902	Manual Annotation
ACVRL1	1734	c.1451 G >	single nucleotide variant	c.1451 G >	Pathogenic	Primary pulmonary hypertension	10	PMID: 23298310	Manual Annotation
ACVRL1	1734	1451G>A	single nucleotide variant	1451G>A	Pathogenic	Primary pulmonary hypertension	10	PMID: 20056902	Manual Annotation
ACVRL1	1734	1451G>A	single nucleotide variant	1451G>A	Pathogenic	Primary pulmonary hypertension	10	PMID: 20056902	Manual Annotation
ACVRL1	1785	c.1502+7A>G	single nucleotide variant	c.1502+7A>G	Pathogenic	Primary pulmonary hypertension	10	PMID: 25543221	Manual Annotation
ACVRL1	NA		single nucleotide variant	NM_000020.2(ACVRL1):c.*2422A>G	Likely benign	Osler hemorrhagic telangiectasia syndrome	0		ClinVar=309485
ACVRL1	NA		single nucleotide variant	NM_000020.2(ACVRL1):c.*2398G>A	Likely benign	Osler hemorrhagic telangiectasia syndrome	0		ClinVar=309484
ACVRL1	NA		single nucleotide variant	NM_000020.2(ACVRL1):c.*2380C>G	Likely benign	Osler hemorrhagic telangiectasia syndrome	0		ClinVar=309483
ACVRL1	NA		single nucleotide variant	NM_000020.2(ACVRL1):c.*2313G>A	Likely benign	Osler hemorrhagic telangiectasia syndrome	0		ClinVar=309481
ACVRL1	NA		single nucleotide variant	NM_000020.2(ACVRL1):c.*2281G>T	Likely benign	Osler hemorrhagic telangiectasia syndrome	0		ClinVar=309480
ACVRL1	NA		single nucleotide variant	NM_000020.2(ACVRL1):c.*1926T>C	Likely benign	Osler hemorrhagic telangiectasia syndrome	0		ClinVar=309477
ACVRL1	NA		single nucleotide variant	NM_000020.2(ACVRL1):c.*1776C>T	Likely benign	Osler hemorrhagic telangiectasia syndrome	0		ClinVar=309474
ACVRL1	NA		single nucleotide variant	NM_000020.2(ACVRL1):c.*1560A>C	Likely benign	Osler hemorrhagic telangiectasia syndrome	0		ClinVar=309470
ACVRL1	NA		single nucleotide variant	NM_000020.2(ACVRL1):c.*1246T>C	Benign	Osler hemorrhagic telangiectasia syndrome	0		ClinVar=309467
ACVRL1	NA		single nucleotide variant	NM_000020.2(ACVRL1):c.*1042C>T	Likely benign	Osler hemorrhagic telangiectasia syndrome	0		ClinVar=309466
ACVRL1	NA		single nucleotide variant	NM_000020.2(ACVRL1):c.*1042C>G	Likely benign	Osler hemorrhagic telangiectasia syndrome	0		ClinVar=309465
ACVRL1	NA		single nucleotide variant	NM_000020.2(ACVRL1):c.*1041G>T	Likely benign	Osler hemorrhagic telangiectasia syndrome	0		ClinVar=309464
ACVRL1	NA		single nucleotide variant	NM_000020.2(ACVRL1):c.*1021T>C	Likely benign	Osler hemorrhagic telangiectasia syndrome	0		ClinVar=309463
ACVRL1	NA		single nucleotide variant	NM_000020.2(ACVRL1):c.*992A>G	Likely benign	Osler hemorrhagic telangiectasia syndrome	0		ClinVar=309462
ACVRL1	NA		single nucleotide variant	NM_000020.2(ACVRL1):c.*949C>T	Likely benign	Osler hemorrhagic telangiectasia syndrome	0		ClinVar=309461
ACVRL1	NA		single nucleotide variant	NM_000020.2(ACVRL1):c.*935G>C	Likely benign	Osler hemorrhagic telangiectasia syndrome	0		ClinVar=309460
ACVRL1	NA		single nucleotide variant	NM_000020.2(ACVRL1):c.*913C>T	Likely benign	Osler hemorrhagic telangiectasia syndrome	0		ClinVar=309459
ACVRL1	NA		single nucleotide variant	NM_000020.2(ACVRL1):c.*869C>T	Likely benign	Osler hemorrhagic telangiectasia syndrome	0		ClinVar=309457
ACVRL1	NA		single nucleotide variant	NM_000020.2(ACVRL1):c.*862G>A	Likely benign	Osler hemorrhagic telangiectasia syndrome	0		ClinVar=309456
ACVRL1	NA		Duplication	NM_000020.2(ACVRL1):c.*856dupT	Likely benign	Osler hemorrhagic telangiectasia syndrome	0		ClinVar=309455
ACVRL1	NA		single nucleotide variant	NM_000020.2(ACVRL1):c.*560T>C	Benign	Osler hemorrhagic telangiectasia syndrome	0		ClinVar=309454
ACVRL1	NA		single nucleotide variant	NM_000020.2(ACVRL1):c.*499T>G	Likely benign	Osler hemorrhagic telangiectasia syndrome	0		ClinVar=309453
ACVRL1	NA		single nucleotide variant	NM_000020.2(ACVRL1):c.*423C>T	Likely benign	Osler hemorrhagic telangiectasia syndrome	0		ClinVar=309452
ACVRL1	NA		single nucleotide variant	NM_000020.2(ACVRL1):c.*58G>A	Likely benign	Osler hemorrhagic telangiectasia syndrome	0		ClinVar=309445
ACVRL1	NA		Deletion	NM_000020.2(ACVRL1):c.*45delG	Likely benign	Osler hemorrhagic telangiectasia syndrome	0		ClinVar=309444
AGTR1	204	-137C>A	single nucleotide variant	NM_031850.3(AGTR1):c.-137C>A	Likely benign	Renal dysplasia	0		ClinVar=343666
AGTR1	1019	678C>T	single nucleotide variant	NM_000685.4(AGTR1):c.573C>T (p.Leu191=)	Benign	Renal dysplasia	4		ClinVar=256759
AGTR1	1507	c.1166 A>C	single nucleotide variant	c.1166 A>C	Pathogenic	Primary pulmonary hypertension	4	PMID: 19332265	Manual Annotation
AGTR1	1508	1167A>G	single nucleotide variant	NM_000685.4(AGTR1):c.1062A>G (p.Pro354=)	Benign	Renal dysplasia	4		ClinVar=256758
AGTR1	NA		single nucleotide variant	NM_031850.3(AGTR1):c.*899T>G	Likely benign	Renal dysplasia	0		ClinVar=369406
AGTR1	NA		single nucleotide variant	NM_031850.3(AGTR1):c.*798G>A	Benign	Renal dysplasia	0		ClinVar=343686
AGTR1	NA		single nucleotide variant	NM_031850.3(AGTR1):c.*461C>A	Likely benign	Renal dysplasia	0		ClinVar=343684
AGTR1	NA		single nucleotide variant	NM_031850.3(AGTR1):c.*437G>T	Likely benign	Renal dysplasia	0		ClinVar=343683
AGTR1	NA		single nucleotide variant	NM_031850.3(AGTR1):c.*317G>A	Likely benign	Renal dysplasia	0		ClinVar=343680
AGTR1	NA		single nucleotide variant	NM_031850.3(AGTR1):c.*135C>T	Likely benign	Renal dysplasia	0		ClinVar=343678
AGTR1	NA		single nucleotide variant	NM_031850.3(AGTR1):c.*70T>G	Likely benign	Renal dysplasia	0		ClinVar=343677
BMPR1B	366	92G>A	single nucleotide variant	NM_001203.2(BMPR1B):c.92G>A (p.Arg31His)	Likely benign	Brachydactyly	4		ClinVar=350113
BMPR1B	521	247-9C>T	single nucleotide variant	NM_001203.2(BMPR1B):c.247-9C>T	Likely benign	Brachydactyly	6		ClinVar=350115
BMPR1B	521	247-4A>G	single nucleotide variant	NM_001203.2(BMPR1B):c.247-4A>G	Benign	not specified	6		ClinVar=283921
BMPR1B	692	418G>A	single nucleotide variant	NM_001203.2(BMPR1B):c.418G>A (p.Val140Ile)	Benign	Brachydactyly	7		ClinVar=218545
BMPR1B	719	445C>T	single nucleotide variant	NM_001203.2(BMPR1B):c.445C>T (p.Arg149Trp)	Likely benign	Brachydactyly	7		ClinVar=350116
BMPR1B	753	c.479 G>A S160N	single nucleotide variant	c.479 G>A S160N	Pathogenic	Primary pulmonary hypertension	8	PMID: 22374147	Manual Annotation
BMPR1B	753	c.479G>A S160N	single nucleotide variant	c.479G>A S160N	Pathogenic	Primary pulmonary hypertension	8	PMID: 22374147	Manual Annotation
BMPR1B	945	671G>A	single nucleotide variant	NM_001203.2(BMPR1B):c.671G>A (p.Arg224His)	Likely benign	Brachydactyly	9		ClinVar=350117
BMPR1B	979	705C>T	single nucleotide variant	NM_001203.2(BMPR1B):c.705C>T (p.Thr235=)	Likely benign	Brachydactyly	9		ClinVar=350118
BMPR1B	1165	891C>T	single nucleotide variant	NM_001203.2(BMPR1B):c.891C>T (p.Asp297=)	Likely benign	Brachydactyly	10		ClinVar=350121
BMPR1B	1339	1065T>A	single nucleotide variant	NM_001203.2(BMPR1B):c.1065T>A (p.Val355=)	Likely benign	Brachydactyly	10		ClinVar=350122
BMPR1B	1376	1102C>T	single nucleotide variant	NM_001203.2(BMPR1B):c.1102C>T (p.Pro368Ser)	Likely benign	Brachydactyly	11		ClinVar=350123
BMPR1B	1450	c.1176 C>A F392L	single nucleotide variant	c.1176 C>A F392L	Pathogenic	Primary pulmonary hypertension	11	PMID: 22374147	Manual Annotation
BMPR1B	1450	c.1176C>A F392L	single nucleotide variant	c.1176C>A F392L	Pathogenic	Primary pulmonary hypertension	11	PMID: 22374147	Manual Annotation
BMPR1B	1658	1384-8T>C	single nucleotide variant	NM_001203.2(BMPR1B):c.1384-8T>C	Likely benign	Brachydactyly	13		ClinVar=350126
BMPR1B	NA		single nucleotide variant	NM_001203.2(BMPR1B):c.*3679G>A	Likely benign	Brachydactyly	0		ClinVar=350183
BMPR1B	NA		single nucleotide variant	NM_001203.2(BMPR1B):c.*3646G>A	Likely benign	Brachydactyly	0		ClinVar=350182
BMPR1B	NA		single nucleotide variant	NM_001203.2(BMPR1B):c.*3618G>A	Likely benign	Brachydactyly	0		ClinVar=350181
BMPR1B	NA		single nucleotide variant	NM_001203.2(BMPR1B):c.*3328A>G	Benign	Brachydactyly	0		ClinVar=350179
BMPR1B	NA		single nucleotide variant	NM_001203.2(BMPR1B):c.*3303G>A	Likely benign	Brachydactyly	0		ClinVar=350178
BMPR1B	NA		single nucleotide variant	NM_001203.2(BMPR1B):c.*3277A>T	Likely benign	Brachydactyly	0		ClinVar=350176
BMPR1B	NA		single nucleotide variant	NM_001203.2(BMPR1B):c.*3255C>G	Benign	Brachydactyly	0		ClinVar=350175
BMPR1B	NA		single nucleotide variant	NM_001203.2(BMPR1B):c.*3221T>C	Benign	Brachydactyly	0		ClinVar=350174
BMPR1B	NA		single nucleotide variant	NM_001203.2(BMPR1B):c.*3101A>G	Likely benign	Brachydactyly	0		ClinVar=350173
BMPR1B	NA		single nucleotide variant	NM_001203.2(BMPR1B):c.*2776A>G	Benign	Brachydactyly	0		ClinVar=350171
BMPR1B	NA		single nucleotide variant	NM_001203.2(BMPR1B):c.*2453A>G	Likely benign	Brachydactyly	0		ClinVar=350169
BMPR1B	NA		single nucleotide variant	NM_001203.2(BMPR1B):c.*2433A>G	Likely benign	Brachydactyly	0		ClinVar=350168
BMPR1B	NA		single nucleotide variant	NM_001203.2(BMPR1B):c.*2350C>T	Benign	Brachydactyly	0		ClinVar=350167
BMPR1B	NA		single nucleotide variant	NM_001203.2(BMPR1B):c.*2332T>A	Benign	Brachydactyly	0		ClinVar=350166
BMPR1B	NA		single nucleotide variant	NM_001203.2(BMPR1B):c.*2257C>G	Likely benign	Brachydactyly	0		ClinVar=350164
BMPR1B	NA		single nucleotide variant	NM_001203.2(BMPR1B):c.*2221A>G	Likely benign	Brachydactyly	0		ClinVar=350161
BMPR1B	NA		single nucleotide variant	NM_001203.2(BMPR1B):c.*2217T>C	Likely benign	Brachydactyly	0		ClinVar=350160
BMPR1B	NA		single nucleotide variant	NM_001203.2(BMPR1B):c.*2216C>G	Likely benign	Brachydactyly	0		ClinVar=350159
BMPR1B	NA		single nucleotide variant	NM_001203.2(BMPR1B):c.*2125G>T	Likely benign	Brachydactyly	0		ClinVar=350157
BMPR1B	NA		single nucleotide variant	NM_001203.2(BMPR1B):c.*1972C>A	Likely benign	Brachydactyly	0		ClinVar=350156
BMPR1B	NA		single nucleotide variant	NM_001203.2(BMPR1B):c.*1971C>G	Likely benign	Brachydactyly	0		ClinVar=350155
BMPR1B	NA		single nucleotide variant	NM_001203.2(BMPR1B):c.*1899A>G	Likely benign	Brachydactyly	0		ClinVar=350154
BMPR1B	NA		single nucleotide variant	NM_001203.2(BMPR1B):c.*1559A>G	Benign	Brachydactyly	0		ClinVar=350152
BMPR1B	NA		single nucleotide variant	NM_001203.2(BMPR1B):c.*1361G>A	Benign	Brachydactyly	0		ClinVar=350151
BMPR1B	NA		single nucleotide variant	NM_001203.2(BMPR1B):c.*1113G>A	Likely benign	Brachydactyly	0		ClinVar=350149
BMPR1B	NA		single nucleotide variant	NM_001203.2(BMPR1B):c.*1013C>T	Likely benign	Brachydactyly	0		ClinVar=350148
BMPR1B	NA		single nucleotide variant	NM_001203.2(BMPR1B):c.*989A>G	Benign	Brachydactyly	0		ClinVar=350147
BMPR1B	NA		single nucleotide variant	NM_001203.2(BMPR1B):c.*860T>C	Likely benign	Brachydactyly	0		ClinVar=350146
BMPR1B	NA		single nucleotide variant	NM_001203.2(BMPR1B):c.*641C>T	Benign	Brachydactyly	0		ClinVar=350140
BMPR1B	NA		single nucleotide variant	NM_001203.2(BMPR1B):c.*487G>T	Likely benign	Brachydactyly	0		ClinVar=350138
BMPR1B	NA		single nucleotide variant	NM_001203.2(BMPR1B):c.*413G>A	Likely benign	Brachydactyly	0		ClinVar=350137
BMPR1B	NA		single nucleotide variant	NM_001203.2(BMPR1B):c.*196A>G	Benign	Brachydactyly	0		ClinVar=350133
BMPR1B	NA		single nucleotide variant	NM_001203.2(BMPR1B):c.*195C>T	Benign	Brachydactyly	0		ClinVar=350132
BMPR1B	NA		single nucleotide variant	NM_001203.2(BMPR1B):c.*141C>T	Benign	Brachydactyly	0	PMID:19738052	ClinVar=350131
BMPR1B	NA		single nucleotide variant	NM_001203.2(BMPR1B):c.*126G>A	Likely benign	Brachydactyly	0		ClinVar=350129
BMPR1B	NA		single nucleotide variant	NM_001203.2(BMPR1B):c.*109G>A	Likely benign	Brachydactyly	0		ClinVar=350128
BMPR1B	NA		single nucleotide variant	NM_001203.2(BMPR1B):c.*49C>T	Benign	Brachydactyly	0		ClinVar=350127
BMPR1B	NA		single nucleotide variant	NM_001203.2(BMPR1B):c.*9G>C	Likely benign	Brachydactyly	0	PMID:http://www.ncbi.nlm.nih.gov/variation/tools/1000genomes/?chr=4&from=96075833&to=96075833	ClinVar=287875
BMPR2	218	-930_-928dupGGC	Duplication	NM_001204.6(BMPR2):c.-930_-928dupGGC	Likely benign	Primary pulmonary hypertension	0		ClinVar=333617
BMPR2	221	-927A>G	single nucleotide variant	NM_001204.6(BMPR2):c.-927A>G	Likely benign	Primary pulmonary hypertension	0		ClinVar=333622
BMPR2	227	-921_-919dupAGC	Duplication	NM_001204.6(BMPR2):c.-921_-919dupAGC	Likely benign	Primary pulmonary hypertension	0		ClinVar=333620
BMPR2	444	-704C>G	single nucleotide variant	NM_001204.6(BMPR2):c.-704C>G	Likely benign	Primary pulmonary hypertension	0		ClinVar=333627
BMPR2	838	-310A>G	single nucleotide variant	NM_001204.6(BMPR2):c.-310A>G	Likely benign	Primary pulmonary hypertension	0		ClinVar=333633
BMPR2	847	-301G>A	single nucleotide variant	NM_001204.6(BMPR2):c.-301G>A	Likely benign	Primary pulmonary hypertension	0		ClinVar=333634
BMPR2	936	-212dupC	Duplication	NM_001204.6(BMPR2):c.-212dupC	Likely benign	Primary pulmonary hypertension	0		ClinVar=333635
BMPR2	1055	-93A>G	single nucleotide variant	NM_001204.6(BMPR2):c.-93A>G	Likely benign	Primary pulmonary hypertension	0		ClinVar=333636
BMPR2	1234	86A>G	single nucleotide variant	NM_001204.6(BMPR2):c.86A>G (p.Asn29Ser)	Likely benign	Primary pulmonary hypertension	2		ClinVar=333638
BMPR2	1748	600A>C	single nucleotide variant	NM_001204.6(BMPR2):c.600A>C (p.Leu200=)	Benign	Primary pulmonary hypertension	5		ClinVar=162791
BMPR2	1769	621+8T>C	single nucleotide variant	NM_001204.6(BMPR2):c.621+8T>C	Likely benign	Primary pulmonary hypertension	5		ClinVar=333639
BMPR2	1769	621+37C>G	single nucleotide variant	NM_001204.6(BMPR2):c.621+37C>G	Benign	not specified	5		ClinVar=257624
BMPR2	1822	674G>A	single nucleotide variant	NM_001204.6(BMPR2):c.674G>A (p.Arg225His)	Likely benign	Primary pulmonary hypertension	6		ClinVar=333640
BMPR2	2001	853-21dupC	Duplication	NM_001204.6(BMPR2):c.853-21dupC	Likely benign	not specified	7		ClinVar=257625
BMPR2	3472	2324G>A	single nucleotide variant	NM_001204.6(BMPR2):c.2324G>A (p.Ser775Asn)	Benign	Primary pulmonary hypertension	12		ClinVar=136528
BMPR2	3527	2379A>C	single nucleotide variant	NM_001204.6(BMPR2):c.2379A>C (p.Thr793=)	Likely benign	Primary pulmonary hypertension	12		ClinVar=333648
BMPR2	3896	2748T>C	single nucleotide variant	NM_001204.6(BMPR2):c.2748T>C (p.Leu916=)	Likely benign	Primary pulmonary hypertension	12		ClinVar=333649
BMPR2	3949	2801G>C	single nucleotide variant	NM_001204.6(BMPR2):c.2801G>C (p.Arg934Thr)	Likely benign	Primary pulmonary hypertension	12		ClinVar=333650
BMPR2	3959	2811G>A	single nucleotide variant	NM_001204.6(BMPR2):c.2811G>A (p.Arg937=)	Benign	Primary pulmonary hypertension	12		ClinVar=136529
BMPR2	4160	3012C>T	single nucleotide variant	NM_001204.6(BMPR2):c.3012C>T (p.Gly1004=)	Likely benign	Primary pulmonary hypertension	13		ClinVar=415837
BMPR2	NA		single nucleotide variant	NM_001204.6(BMPR2):c.*7776C>T	Likely benign	Primary pulmonary hypertension	0		ClinVar=333731
BMPR2	NA		single nucleotide variant	NM_001204.6(BMPR2):c.*7496T>C	Likely benign	Primary pulmonary hypertension	0		ClinVar=333728
BMPR2	NA		single nucleotide variant	NM_001204.6(BMPR2):c.*7306A>G	Likely benign	Primary pulmonary hypertension	0		ClinVar=333727
BMPR2	NA		single nucleotide variant	NM_001204.6(BMPR2):c.*7135A>G	Benign	Primary pulmonary hypertension	0		ClinVar=333725
BMPR2	NA		single nucleotide variant	NM_001204.6(BMPR2):c.*6879A>G	Likely benign	Primary pulmonary hypertension	0		ClinVar=333723
BMPR2	NA		single nucleotide variant	NM_001204.6(BMPR2):c.*6695C>T	Likely benign	Primary pulmonary hypertension	0		ClinVar=333722
BMPR2	NA		single nucleotide variant	NM_001204.6(BMPR2):c.*6525G>A	Likely benign	Primary pulmonary hypertension	0		ClinVar=333721
BMPR2	NA		single nucleotide variant	NM_001204.6(BMPR2):c.*6108G>T	Likely benign	Primary pulmonary hypertension	0		ClinVar=333719
BMPR2	NA		single nucleotide variant	NM_001204.6(BMPR2):c.*6001T>C	Likely benign	Primary pulmonary hypertension	0		ClinVar=333718
BMPR2	NA		single nucleotide variant	NM_001204.6(BMPR2):c.*5998G>A	Benign	Primary pulmonary hypertension	0		ClinVar=333717
BMPR2	NA		single nucleotide variant	NM_001204.6(BMPR2):c.*5946C>T	Likely benign	Primary pulmonary hypertension	0		ClinVar=333716
BMPR2	NA		single nucleotide variant	NM_001204.6(BMPR2):c.*5787T>G	Benign	Primary pulmonary hypertension	0		ClinVar=333715
BMPR2	NA		single nucleotide variant	NM_001204.6(BMPR2):c.*5627G>T	Likely benign	Primary pulmonary hypertension	0		ClinVar=333713
BMPR2	NA		single nucleotide variant	NM_001204.6(BMPR2):c.*5246C>T	Likely benign	Primary pulmonary hypertension	0		ClinVar=333709
BMPR2	NA		single nucleotide variant	NM_001204.6(BMPR2):c.*5243T>C	Likely benign	Primary pulmonary hypertension	0		ClinVar=333708
BMPR2	NA		single nucleotide variant	NM_001204.6(BMPR2):c.*5152A>G	Likely benign	Primary pulmonary hypertension	0		ClinVar=333705
BMPR2	NA		single nucleotide variant	NM_001204.6(BMPR2):c.*5044A>G	Likely benign	Primary pulmonary hypertension	0		ClinVar=333703
BMPR2	NA		single nucleotide variant	NM_001204.6(BMPR2):c.*5031C>T	Likely benign	Primary pulmonary hypertension	0		ClinVar=333701
BMPR2	NA		single nucleotide variant	NM_001204.6(BMPR2):c.*4905C>A	Likely benign	Primary pulmonary hypertension	0		ClinVar=333700
BMPR2	NA		single nucleotide variant	NM_001204.6(BMPR2):c.*4364C>T	Likely benign	Primary pulmonary hypertension	0		ClinVar=333697
BMPR2	NA		single nucleotide variant	NM_001204.6(BMPR2):c.*3907G>C	Benign	Primary pulmonary hypertension	0		ClinVar=333695
BMPR2	NA		Deletion	NM_001204.6(BMPR2):c.*3823_*3825delCAA	Benign	Primary pulmonary hypertension	0		ClinVar=333694
BMPR2	NA		single nucleotide variant	NM_001204.6(BMPR2):c.*3353T>C	Likely benign	Primary pulmonary hypertension	0		ClinVar=333688
BMPR2	NA		single nucleotide variant	NM_001204.6(BMPR2):c.*3350G>T	Likely benign	Primary pulmonary hypertension	0		ClinVar=333687
BMPR2	NA		single nucleotide variant	NM_001204.6(BMPR2):c.*2939A>G	Likely benign	Primary pulmonary hypertension	0		ClinVar=333685
BMPR2	NA		single nucleotide variant	NM_001204.6(BMPR2):c.*2901A>C	Likely benign	Primary pulmonary hypertension	0		ClinVar=333684
BMPR2	NA		Duplication	NM_001204.6(BMPR2):c.*2901dupA	Benign	Primary pulmonary hypertension	0		ClinVar=333682
BMPR2	NA		single nucleotide variant	NM_001204.6(BMPR2):c.*2833G>A	Likely benign	Primary pulmonary hypertension	0		ClinVar=333680
BMPR2	NA		single nucleotide variant	NM_001204.6(BMPR2):c.*2769T>A	Likely benign	Primary pulmonary hypertension	0		ClinVar=333679
BMPR2	NA		single nucleotide variant	NM_001204.6(BMPR2):c.*2519A>G	Likely benign	Primary pulmonary hypertension	0		ClinVar=333678
BMPR2	NA		single nucleotide variant	NM_001204.6(BMPR2):c.*2173A>G	Likely benign	Primary pulmonary hypertension	0		ClinVar=333676
BMPR2	NA		single nucleotide variant	NM_001204.6(BMPR2):c.*1999T>G	Benign	Primary pulmonary hypertension	0		ClinVar=333674
BMPR2	NA		single nucleotide variant	NM_001204.6(BMPR2):c.*1732T>C	Likely benign	Primary pulmonary hypertension	0		ClinVar=333673
BMPR2	NA		single nucleotide variant	NM_001204.6(BMPR2):c.*1466T>G	Benign	Primary pulmonary hypertension	0		ClinVar=333672
BMPR2	NA		single nucleotide variant	NM_001204.6(BMPR2):c.*1306A>C	Likely benign	Primary pulmonary hypertension	0		ClinVar=333670
BMPR2	NA		single nucleotide variant	NM_001204.6(BMPR2):c.*1236C>A	Likely benign	Primary pulmonary hypertension	0		ClinVar=333668
BMPR2	NA		single nucleotide variant	NM_001204.6(BMPR2):c.*1226C>A	Likely benign	Primary pulmonary hypertension	0		ClinVar=333667
BMPR2	NA		single nucleotide variant	NM_001204.6(BMPR2):c.*995G>A	Likely benign	Primary pulmonary hypertension	0		ClinVar=333666
BMPR2	NA		single nucleotide variant	NM_001204.6(BMPR2):c.*815C>T	Likely benign	Primary pulmonary hypertension	0		ClinVar=333665
BMPR2	NA		single nucleotide variant	NM_001204.6(BMPR2):c.*806C>T	Benign	Primary pulmonary hypertension	0		ClinVar=333664
BMPR2	NA		single nucleotide variant	NM_001204.6(BMPR2):c.*378T>G	Likely benign	Primary pulmonary hypertension	0		ClinVar=333660
BMPR2	NA		Deletion	NM_001204.6(BMPR2):c.*309delA	Likely benign	Primary pulmonary hypertension	0		ClinVar=333659
BMPR2	NA		single nucleotide variant	NM_001204.6(BMPR2):c.*221C>T	Likely benign	Primary pulmonary hypertension	0		ClinVar=333657
BMPR2	NA		single nucleotide variant	NM_001204.6(BMPR2):c.*130G>C	Likely benign	Primary pulmonary hypertension	0		ClinVar=333656
BMPR2	NA		single nucleotide variant	NM_001204.6(BMPR2):c.*106C>T	Likely benign	Primary pulmonary hypertension	0		ClinVar=333655
CAV1	308	30+14G>T	single nucleotide variant	NM_001753.4(CAV1):c.30+14G>T	Benign	not specified	1		ClinVar=379541
CAV1	308	30+19dupG	Duplication	NM_001753.4(CAV1):c.30+19dupG	Benign	not specified	1		ClinVar=212818
CAV1	434	156C>T	single nucleotide variant	NM_001753.4(CAV1):c.156C>T (p.Val52=)	Benign	not specified	2		ClinVar=128610
CAV1	741	c.463G_A	single nucleotide variant	c.463G_A	Pathogenic	Primary pulmonary hypertension	3	PMID: 22474227	Manual Annotation
CAV1	751	c.473delC	Deletion	c.473delC	Pathogenic	Primary pulmonary hypertension	3	PMID: 22474227	Manual Annotation
CAV1	752	c.474delA	Deletion	c.474delA	Pathogenic	Primary pulmonary hypertension	3	PMID: 22474227	Manual Annotation
EDN1	468	c.-134delA	Deletion	c.-134delA	Pathogenic	Primary pulmonary hypertension	2	PMID: 21537392	Manual Annotation
EDN1	928	c.594G>T K198N	single nucleotide variant	c.594G>T K198N	Pathogenic	Primary pulmonary hypertension	5	PMID: 21537392	Manual Annotation
EDNRA	1499	c.969T>C H323H	single nucleotide variant	c.969T>C H323H	Pathogenic	Primary pulmonary hypertension	6	PMID: 21773759	Manual Annotation
EDNRA	1499	c.969T>C	single nucleotide variant	c.969T>C	Pathogenic	Primary pulmonary hypertension	6	PMID: 21773759	Manual Annotation
EIF2AK4	171	99T>C	single nucleotide variant	NM_001013703.3(EIF2AK4):c.99T>C (p.Ile33=)	Benign	not specified	1		ClinVar=381178
EIF2AK4	1393	1321A>C	single nucleotide variant	NM_001013703.3(EIF2AK4):c.1321A>C (p.Ile441Leu)	Benign	not specified	9		ClinVar=381213
EIF2AK4	1739	1667A>G	single nucleotide variant	NM_001013703.3(EIF2AK4):c.1667A>G (p.Glu556Gly)	Benign	not specified	11		ClinVar=381179
EIF2AK4	2280	2208_2213dupCGACGA	Duplication	NM_001013703.3(EIF2AK4):c.2208_2213dupCGACGA (p.Asp737_Glu738insAspAsp)	Benign	not specified	12		ClinVar=402821
EIF2AK4	2321	2249+7G>A	single nucleotide variant	NM_001013703.3(EIF2AK4):c.2249+7G>A	Benign	not specified	12		ClinVar=381180
EIF2AK4	3416	c.3344C>T(p.P1115L)	single nucleotide variant	c.3344C>T(p.P1115L)	Pathogenic	Primary pulmonary hypertension	23	PMID: 25512148	Manual Annotation
EIF2AK4	3480	3408-14G>C	single nucleotide variant	NM_001013703.3(EIF2AK4):c.3408-14G>C	Benign	not specified	25		ClinVar=381181
EIF2AK4	3988	3916G>T	single nucleotide variant	NM_001013703.3(EIF2AK4):c.3916G>T (p.Gly1306Cys)	Benign	not specified	28		ClinVar=381182
EIF2AK4	4246	4174-17G>T	single nucleotide variant	NM_001013703.3(EIF2AK4):c.4174-17G>T	Benign	not specified	31		ClinVar=381183
EIF2AK4	4287	4215C>T	single nucleotide variant	NM_001013703.3(EIF2AK4):c.4215C>T (p.Gly1405=)	Benign	not specified	31		ClinVar=381184
EIF2AK4	4634	4562-8G>T	single nucleotide variant	NM_001013703.3(EIF2AK4):c.4562-8G>T	Benign	not specified	35		ClinVar=381185
EIF2AK4	NA		single nucleotide variant	NM_001013703.3(EIF2AK4):c.*1380G>A	Benign	not specified	0		ClinVar=402823
EIF2AK4	NA		single nucleotide variant	NM_001013703.3(EIF2AK4):c.*1290G>C	Benign	not specified	0		ClinVar=402822
EIF2AK4	NA		single nucleotide variant	NM_001013703.3(EIF2AK4):c.*16G>A	Benign	not specified	0		ClinVar=381187
EIF2AK4	NA		single nucleotide variant	NM_001013703.3(EIF2AK4):c.*5A>G	Benign	not specified	0		ClinVar=381186
ENG	303	-115G>C	single nucleotide variant	NM_000118.3(ENG):c.-115G>C	Likely benign	Osler hemorrhagic telangiectasia syndrome	0		ClinVar=365100
ENG	364	-54C>A	single nucleotide variant	NM_000118.3(ENG):c.-54C>A	Likely benign	Osler hemorrhagic telangiectasia syndrome	0		ClinVar=365097
ENG	409	-9G>A	single nucleotide variant	NM_000118.3(ENG):c.-9G>A	Likely benign	Osler hemorrhagic telangiectasia syndrome	0		ClinVar=414302
ENG	432	14C>T	single nucleotide variant	NM_000118.3(ENG):c.14C>T (p.Thr5Met)	Benign	Osler hemorrhagic telangiectasia syndrome	1		ClinVar=178774
ENG	440	c. 22T>C	single nucleotide variant	c. 22T>C	Pathogenic	Primary pulmonary hypertension	1	PMID: 15687131	Manual Annotation
ENG	486	68-9C>G	single nucleotide variant	NM_000118.3(ENG):c.68-9C>G	Likely benign	Osler hemorrhagic telangiectasia syndrome	2		ClinVar=414303
ENG	538	120C>T	single nucleotide variant	NM_000118.3(ENG):c.120C>T (p.Gly40=)	Benign	Osler hemorrhagic telangiectasia syndrome	2		ClinVar=237016
ENG	568	150G>A	single nucleotide variant	NM_000118.3(ENG):c.150G>A (p.Ser50=)	Likely benign	Osler hemorrhagic telangiectasia syndrome	2		ClinVar=237019
ENG	577	159C>T	single nucleotide variant	NM_000118.3(ENG):c.159C>T (p.Cys53=)	Benign	Osler hemorrhagic telangiectasia syndrome	2		ClinVar=237021
ENG	597	179_180delCCinsAA	Indel	NM_000118.3(ENG):c.179_180delCCinsAA (p.Ala60Glu)	Likely benign	Osler hemorrhagic telangiectasia syndrome	2		ClinVar=414311
ENG	625	207G>A	single nucleotide variant	NM_000118.3(ENG):c.207G>A (p.Leu69=)	Benign	Osler hemorrhagic telangiectasia syndrome	2		ClinVar=137208
ENG	637	219+25G>T	single nucleotide variant	NM_000118.3(ENG):c.219+25G>T	Benign	not specified	2		ClinVar=255144
ENG	637	219+22C>T	single nucleotide variant	NM_000118.3(ENG):c.219+22C>T	Benign	Osler hemorrhagic telangiectasia syndrome	2		ClinVar=237026
ENG	643	225G>A	single nucleotide variant	NM_000118.3(ENG):c.225G>A (p.Pro75=)	Benign	Osler hemorrhagic telangiectasia syndrome	3		ClinVar=414305
ENG	650	232C>T	single nucleotide variant	NM_000118.3(ENG):c.232C>T (p.Leu78=)	Likely benign	Osler hemorrhagic telangiectasia syndrome	3		ClinVar=414306
ENG	709	291G>C	single nucleotide variant	NM_000118.3(ENG):c.291G>C (p.Leu97=)	Likely benign	Osler hemorrhagic telangiectasia syndrome	3		ClinVar=386058
ENG	778	360+21C>T	single nucleotide variant	NM_000118.3(ENG):c.360+21C>T	Benign	not specified	3		ClinVar=255145
ENG	806	388C>T	single nucleotide variant	NM_000118.3(ENG):c.388C>T (p.Pro130Ser)	Likely benign	Osler hemorrhagic telangiectasia syndrome	4		ClinVar=414312
ENG	862	444G>T	single nucleotide variant	NM_000118.3(ENG):c.444G>T (p.Glu148Asp)	Likely benign	not specified	4		ClinVar=213199
ENG	916	c.498G>A	single nucleotide variant	c.498G>A	Pathogenic	Primary pulmonary hypertension	4	PMID: 25543221	Manual Annotation
ENG	942	524-15C>T	single nucleotide variant	NM_000118.3(ENG):c.524-15C>T	Likely benign	Osler hemorrhagic telangiectasia syndrome	5		ClinVar=365092
ENG	990	572G>A	single nucleotide variant	NM_000118.3(ENG):c.572G>A (p.Gly191Asp)	Benign	Osler hemorrhagic telangiectasia syndrome	5		ClinVar=213200
ENG	1058	c.640 G > A	single nucleotide variant	c.640 G > A	Pathogenic	Primary pulmonary hypertension	5	PMID: xx	Manual Annotation
ENG	1192	774C>T	single nucleotide variant	NM_000118.3(ENG):c.774C>T (p.Tyr258=)	Likely benign	Osler hemorrhagic telangiectasia syndrome	6		ClinVar=414313
ENG	1235	817-79C>A	single nucleotide variant	NM_000118.3(ENG):c.817-79C>A	Likely benign	Osler hemorrhagic telangiectasia syndrome	7		ClinVar=237031
ENG	1327	909C>T	single nucleotide variant	NM_000118.3(ENG):c.909C>T (p.Ala303=)	Likely benign	Osler hemorrhagic telangiectasia syndrome	7		ClinVar=365090
ENG	1409	991+26_991+27insCCTCCC	Insertion	NM_000118.3(ENG):c.991+26_991+27insCCTCCC	Benign	not specified	7		ClinVar=213201
ENG	1417	999G>A	single nucleotide variant	NM_000118.3(ENG):c.999G>A (p.Arg333=)	Likely benign	Osler hemorrhagic telangiectasia syndrome	8		ClinVar=414301
ENG	1432	1014C>T	single nucleotide variant	NM_000118.3(ENG):c.1014C>T (p.Pro338=)	Likely benign	not specified	8		ClinVar=387433
ENG	1438	1020G>A	single nucleotide variant	NM_000118.3(ENG):c.1020G>A (p.Pro340=)	Likely benign	Osler hemorrhagic telangiectasia syndrome	8		ClinVar=414308
ENG	1447	1029C>T	single nucleotide variant	NM_000118.3(ENG):c.1029C>T (p.Thr343=)	Benign	Osler hemorrhagic telangiectasia syndrome	8		ClinVar=137209
ENG	1478	1060C>T	single nucleotide variant	NM_000118.3(ENG):c.1060C>T (p.Leu354=)	Benign	Osler hemorrhagic telangiectasia syndrome	8		ClinVar=137210
ENG	1513	1095C>T	single nucleotide variant	NM_000118.3(ENG):c.1095C>T (p.Asp365=)	Likely benign	Osler hemorrhagic telangiectasia syndrome	8		ClinVar=365089
ENG	1514	1096G>C	single nucleotide variant	NM_000118.3(ENG):c.1096G>C (p.Asp366His)	Benign	Osler hemorrhagic telangiectasia syndrome	8		ClinVar=163406
ENG	1516	1098C>T	single nucleotide variant	NM_000118.3(ENG):c.1098C>T (p.Asp366=)	Likely benign	Osler hemorrhagic telangiectasia syndrome	8		ClinVar=414307
ENG	1691	1273-4G>A	single nucleotide variant	NM_000118.3(ENG):c.1273-4G>A	Likely benign	Osler hemorrhagic telangiectasia syndrome	10		ClinVar=237017
ENG	1792	1374A>G	single nucleotide variant	NM_000118.3(ENG):c.1374A>G (p.Pro458=)	Benign	Osler hemorrhagic telangiectasia syndrome	11		ClinVar=213202
ENG	1864	1446C>T	single nucleotide variant	NM_000118.3(ENG):c.1446C>T (p.Ser482=)	Likely benign	Osler hemorrhagic telangiectasia syndrome	12		ClinVar=414309
ENG	1865	1447G>A	single nucleotide variant	NM_000118.3(ENG):c.1447G>A (p.Val483Ile)	Likely benign	Osler hemorrhagic telangiectasia syndrome	12		ClinVar=414304
ENG	1870	1452C>T	single nucleotide variant	NM_000118.3(ENG):c.1452C>T (p.Ser484=)	Likely benign	Osler hemorrhagic telangiectasia syndrome	12		ClinVar=255142
ENG	1873	1455G>A	single nucleotide variant	NM_000118.3(ENG):c.1455G>A (p.Glu485=)	Likely benign	not specified	12		ClinVar=385734
ENG	1951	1533G>A	single nucleotide variant	NM_000118.3(ENG):c.1533G>A (p.Ala511=)	Benign	Osler hemorrhagic telangiectasia syndrome	12		ClinVar=237020
ENG	2051	c.1633 G > A	single nucleotide variant	c.1633 G > A	Pathogenic	Primary pulmonary hypertension	12	PMID: 26167679	Manual Annotation
ENG	2105	1687-17C>T	single nucleotide variant	NM_000118.3(ENG):c.1687-17C>T	Likely benign	not specified	13		ClinVar=388615
ENG	2105	1687-7C>T	single nucleotide variant	NM_000118.3(ENG):c.1687-7C>T	Likely benign	not specified	13		ClinVar=255143
ENG	2130	1712G>A	single nucleotide variant	NM_000118.3(ENG):c.1712G>A (p.Arg571His)	Likely benign	Osler hemorrhagic telangiectasia syndrome	13		ClinVar=414310
ENG	2212	1794T>C	single nucleotide variant	NM_000118.3(ENG):c.1794T>C (p.Gly598=)	Benign	Osler hemorrhagic telangiectasia syndrome	14		ClinVar=213203
ENG	2262	1844C>T	single nucleotide variant	NM_000118.3(ENG):c.1844C>T (p.Ser615Leu)	Likely benign	Osler hemorrhagic telangiectasia syndrome	14		ClinVar=161229
ENG	2263	1845G>T	single nucleotide variant	NM_000118.3(ENG):c.1845G>T (p.Ser615=)	Likely benign	Osler hemorrhagic telangiectasia syndrome	14		ClinVar=237025
ENG	NA		Deletion	NM_000118.3(ENG):c.*700_*703delAACT	Likely benign	Osler hemorrhagic telangiectasia syndrome	0		ClinVar=365078
ENG	NA		single nucleotide variant	NM_001114753.2(ENG):c.1932C>T (p.Ile644=)	Benign	Osler hemorrhagic telangiectasia syndrome	0		ClinVar=226632
KCNA5	62	-167C>T	single nucleotide variant	NM_002234.3(KCNA5):c.-167C>T	Likely benign	Familial atrial fibrillation	0		ClinVar=309329
KCNA5	321	92G>T	single nucleotide variant	NM_002234.3(KCNA5):c.92G>T (p.Gly31Val)	Likely benign	not provided	1		ClinVar=309332
KCNA5	354	c.125T>A	single nucleotide variant	c.125T>A	Pathogenic	Primary pulmonary hypertension	1	PMID: 24936649	Manual Annotation
KCNA5	411	182 G>A (G182R)	single nucleotide variant	182 G>A (G182R)	Pathogenic	Primary pulmonary hypertension	1	PMID: 17267549	Manual Annotation
KCNA5	440	211 G>C (E211D)	single nucleotide variant	211 G>C (E211D)	Pathogenic	Primary pulmonary hypertension	1	PMID: 17267549	Manual Annotation
KCNA5	482	c.253C>A	single nucleotide variant	c.253C>A	Pathogenic	Primary pulmonary hypertension	1	PMID: 24936649	Manual Annotation
KCNA5	569	c.340A>C	single nucleotide variant	c.340A>C	Pathogenic	Primary pulmonary hypertension	1	PMID: 24936649	Manual Annotation
KCNA5	594	c.-365C>T	single nucleotide variant	c.-365C>T	Pathogenic	Primary pulmonary hypertension	1	PMID: 23861362	Manual Annotation
KCNA5	610	381C>T	single nucleotide variant	NM_002234.3(KCNA5):c.381C>T (p.Ser127=)	Likely benign	Familial atrial fibrillation	1		ClinVar=309336
KCNA5	614	c.385C>G	single nucleotide variant	c.385C>G	Pathogenic	Primary pulmonary hypertension	1	PMID: 24936649	Manual Annotation
KCNA5	738	c.509C>G	single nucleotide variant	c.509C>G	Pathogenic	Primary pulmonary hypertension	1	PMID: 24936649	Manual Annotation
KCNA5	773	c.544G>A (p.G182R)	single nucleotide variant	c.544G>A (p.G182R)	Pathogenic	Primary pulmonary hypertension	1	PMID: 17267549	Manual Annotation
KCNA5	780	c.551G>C(p.(R184P))	single nucleotide variant	c.551G>C(p.(R184P))	Pathogenic	Primary pulmonary hypertension	1	PMID: 24936649	Manual Annotation
KCNA5	862	c.633G>C(p.Glu211Asp)	single nucleotide variant	c.633G>C(p.Glu211Asp)	Pathogenic	Primary pulmonary hypertension	1	PMID: 17267549	Manual Annotation
KCNA5	980	751G>A	single nucleotide variant	NM_002234.3(KCNA5):c.751G>A (p.Ala251Thr)	Benign	not specified	1		ClinVar=191570
KCNA5	1158	929C>T	single nucleotide variant	NM_002234.3(KCNA5):c.929C>T (p.Pro310Leu)	Benign	not specified	1		ClinVar=191571
KCNA5	1378	1149T>C	single nucleotide variant	NM_002234.3(KCNA5):c.1149T>C (p.Gly383=)	Benign	not specified	1		ClinVar=258594
KCNA5	1896	p.Y483*	Deletion	p.Y483*	Pathogenic	Primary pulmonary hypertension	1	PMID: 25189502	Manual Annotation
KCNA5	1962	1733G>A	single nucleotide variant	NM_002234.3(KCNA5):c.1733G>A (p.Arg578Lys)	Benign	not specified	1		ClinVar=191573
KCNA5	1962	c.1733G>A	single nucleotide variant	c.1733G>A	Pathogenic	Primary pulmonary hypertension	1	PMID: 24936649	Manual Annotation
KCNA5	2071	c.1842+508A>T	single nucleotide variant	c.1842+508A>T	Pathogenic	Primary pulmonary hypertension	1	PMID: 24936649	Manual Annotation
KCNA5	NA		single nucleotide variant	NM_002234.3(KCNA5):c.*800G>A	Likely benign	Familial atrial fibrillation	0		ClinVar=369020
KCNA5	NA		single nucleotide variant	NM_002234.3(KCNA5):c.*736A>T	Likely benign	Familial atrial fibrillation	0		ClinVar=309343
KCNA5	NA		single nucleotide variant	NM_002234.3(KCNA5):c.*508A>T	Likely benign	Familial atrial fibrillation	0		ClinVar=309342
KCNK3	249	p.T29K	single nucleotide variant	p.T29K	Pathogenic	Primary pulmonary hypertension	1	PMID: 23883380	Manual Annotation
KCNK3	515	p.G118R	single nucleotide variant	p.G118R	Pathogenic	Primary pulmonary hypertension	2	PMID: 23883380	Manual Annotation
KCNK3	738	p.Y192C	single nucleotide variant	p.Y192C	Pathogenic	Primary pulmonary hypertension	2	PMID: 23883380	Manual Annotation
KCNK3	770	p.G203D	single nucleotide variant	p.G203D	Pathogenic	Primary pulmonary hypertension	2	PMID: 23883380	Manual Annotation
KCNK3	771	c.608 G>A (G203D)	single nucleotide variant	c.608 G>A (G203D)	Pathogenic	Primary pulmonary hypertension	2	PMID: 23883380	Manual Annotation
KCNK3	824	p.V221L	single nucleotide variant	p.V221L	Pathogenic	Primary pulmonary hypertension	2	PMID: 23883380	Manual Annotation
KCNK3	NA		single nucleotide variant	NM_002246.2(KCNK3):c.*13G>A	Benign	not specified	0		ClinVar=402999
NOS2	664	c.-400delCCTTT	single nucleotide variant	c.-400delCCTTT	Pathogenic	Primary pulmonary hypertension	5	PMID: 24439467	Manual Annotation
NOTCH3	196	120C>G	single nucleotide variant	NM_000435.2(NOTCH3):c.120C>G (p.Ala40=)	Likely benign	not specified	2		ClinVar=256119
NOTCH3	379	303C>T	single nucleotide variant	NM_000435.2(NOTCH3):c.303C>T (p.Thr101=)	Benign	Cerebral autosomal dominant arteriopathy with subcortical infarcts and leukoencephalopathy	3		ClinVar=256131
NOTCH3	414	338G>A	single nucleotide variant	NM_000435.2(NOTCH3):c.338G>A (p.Arg113Gln)	Likely benign	Cerebral autosomal dominant arteriopathy with subcortical infarcts and leukoencephalopathy	3		ClinVar=328419
NOTCH3	585	509A>G	single nucleotide variant	NM_000435.2(NOTCH3):c.509A>G (p.His170Arg)	Likely benign	Cerebral autosomal dominant arteriopathy with subcortical infarcts and leukoencephalopathy	4	PMID:24086431	ClinVar=328418
NOTCH3	682	606A>G	single nucleotide variant	NM_000435.2(NOTCH3):c.606A>G (p.Ala202=)	Benign	Cerebral autosomal dominant arteriopathy with subcortical infarcts and leukoencephalopathy	4		ClinVar=256148
NOTCH3	736	660C>T	single nucleotide variant	NM_000435.2(NOTCH3):c.660C>T (p.Tyr220=)	Likely benign	Cerebral autosomal dominant arteriopathy with subcortical infarcts and leukoencephalopathy	4		ClinVar=328417
NOTCH3	1021	945C>T	single nucleotide variant	NM_000435.2(NOTCH3):c.945C>T (p.Ile315=)	Likely benign	Cerebral autosomal dominant arteriopathy with subcortical infarcts and leukoencephalopathy	6		ClinVar=328414
NOTCH3	1040	964G>A	single nucleotide variant	NM_000435.2(NOTCH3):c.964G>A (p.Val322Met)	Likely benign	Cerebral autosomal dominant arteriopathy with subcortical infarcts and leukoencephalopathy	6		ClinVar=328413
NOTCH3	1216	1140T>C	single nucleotide variant	NM_000435.2(NOTCH3):c.1140T>C (p.Pro380=)	Benign	Cerebral autosomal dominant arteriopathy with subcortical infarcts and leukoencephalopathy	7		ClinVar=256117
NOTCH3	1268	1192+15A>G	single nucleotide variant	NM_000435.2(NOTCH3):c.1192+15A>G	Benign	Cerebral autosomal dominant arteriopathy with subcortical infarcts and leukoencephalopathy	7		ClinVar=256118
NOTCH3	1563	1487C>T	single nucleotide variant	NM_000435.2(NOTCH3):c.1487C>T (p.Pro496Leu)	Benign	Cerebral autosomal dominant arteriopathy with subcortical infarcts and leukoencephalopathy	9		ClinVar=256120
NOTCH3	1566	1490C>T	single nucleotide variant	NM_000435.2(NOTCH3):c.1490C>T (p.Ser497Leu)	Benign	Cerebral autosomal dominant arteriopathy with subcortical infarcts and leukoencephalopathy	9	PMID:20038773	ClinVar=256121
NOTCH3	1696	1620G>T	single nucleotide variant	NM_000435.2(NOTCH3):c.1620G>T (p.Thr540=)	Likely benign	Cerebral autosomal dominant arteriopathy with subcortical infarcts and leukoencephalopathy	11		ClinVar=328410
NOTCH3	1766	1690G>A	single nucleotide variant	NM_000435.2(NOTCH3):c.1690G>A (p.Ala564Thr)	Likely benign	Cerebral autosomal dominant arteriopathy with subcortical infarcts and leukoencephalopathy	11		ClinVar=328409
NOTCH3	1801	1725G>A	single nucleotide variant	NM_000435.2(NOTCH3):c.1725G>A (p.Thr575=)	Benign	Cerebral autosomal dominant arteriopathy with subcortical infarcts and leukoencephalopathy	11		ClinVar=256122
NOTCH3	1858	1782C>T	single nucleotide variant	NM_000435.2(NOTCH3):c.1782C>T (p.Gly594=)	Benign	Cerebral autosomal dominant arteriopathy with subcortical infarcts and leukoencephalopathy	11		ClinVar=256123
NOTCH3	1916	1840+19G>A	single nucleotide variant	NM_000435.2(NOTCH3):c.1840+19G>A	Likely benign	not specified	11		ClinVar=256124
NOTCH3	2115	2039G>A	single nucleotide variant	NM_000435.2(NOTCH3):c.2039G>A (p.Arg680His)	Benign	Cerebral autosomal dominant arteriopathy with subcortical infarcts and leukoencephalopathy	13		ClinVar=256125
NOTCH3	2278	2202C>T	single nucleotide variant	NM_000435.2(NOTCH3):c.2202C>T (p.Ala734=)	Benign	Cerebral autosomal dominant arteriopathy with subcortical infarcts and leukoencephalopathy	14		ClinVar=256126
NOTCH3	2376	2300G>A	single nucleotide variant	NM_000435.2(NOTCH3):c.2300G>A (p.Arg767His)	Benign	not specified	15		ClinVar=256127
NOTCH3	2487	2411-4C>G	single nucleotide variant	NM_000435.2(NOTCH3):c.2411-4C>G	Likely benign	Cerebral autosomal dominant arteriopathy with subcortical infarcts and leukoencephalopathy	16		ClinVar=256128
NOTCH3	2595	c.2519G>A p.G840E	single nucleotide variant	c.2519G>A p.G840E	Pathogenic	Primary pulmonary hypertension	16	PMID: 24936512	Manual Annotation
NOTCH3	2614	2538C>T	single nucleotide variant	NM_000435.2(NOTCH3):c.2538C>T (p.Cys846=)	Benign	Cerebral autosomal dominant arteriopathy with subcortical infarcts and leukoencephalopathy	16		ClinVar=256129
NOTCH3	2656	2580C>T	single nucleotide variant	NM_000435.2(NOTCH3):c.2580C>T (p.Asn860=)	Likely benign	Cerebral autosomal dominant arteriopathy with subcortical infarcts and leukoencephalopathy	17		ClinVar=328405
NOTCH3	2774	c.2698A>C p.T900P	single nucleotide variant	c.2698A>C p.T900P	Pathogenic	Primary pulmonary hypertension	17	PMID: 24936512	Manual Annotation
NOTCH3	2818	2742A>G	single nucleotide variant	NM_000435.2(NOTCH3):c.2742A>G (p.Pro914=)	Benign	Cerebral autosomal dominant arteriopathy with subcortical infarcts and leukoencephalopathy	17		ClinVar=256130
NOTCH3	3475	3399C>A	single nucleotide variant	NM_000435.2(NOTCH3):c.3399C>A (p.His1133Gln)	Benign	Cerebral autosomal dominant arteriopathy with subcortical infarcts and leukoencephalopathy	21		ClinVar=256132
NOTCH3	3537	3461-15C>T	single nucleotide variant	NM_000435.2(NOTCH3):c.3461-15C>T	Likely benign	Cerebral autosomal dominant arteriopathy with subcortical infarcts and leukoencephalopathy	22		ClinVar=328396
NOTCH3	3599	3523C>T	single nucleotide variant	NM_000435.2(NOTCH3):c.3523C>T (p.Arg1175Trp)	Likely benign	Cerebral autosomal dominant arteriopathy with subcortical infarcts and leukoencephalopathy	22		ClinVar=328395
NOTCH3	3623	3547G>A	single nucleotide variant	NM_000435.2(NOTCH3):c.3547G>A (p.Val1183Met)	Benign	Cerebral autosomal dominant arteriopathy with subcortical infarcts and leukoencephalopathy	22		ClinVar=256133
NOTCH3	3715	3639C>T	single nucleotide variant	NM_000435.2(NOTCH3):c.3639C>T (p.Ala1213=)	Likely benign	not specified	22		ClinVar=256134
NOTCH3	3780	3704A>T	single nucleotide variant	NM_000435.2(NOTCH3):c.3704A>T (p.His1235Leu)	Likely benign	Cerebral autosomal dominant arteriopathy with subcortical infarcts and leukoencephalopathy	22		ClinVar=328393
NOTCH3	3795	3719-11C>T	single nucleotide variant	NM_000435.2(NOTCH3):c.3719-11C>T	Likely benign	Cerebral autosomal dominant arteriopathy with subcortical infarcts and leukoencephalopathy	23		ClinVar=328392
NOTCH3	4147	4071C>T	single nucleotide variant	NM_000435.2(NOTCH3):c.4071C>T (p.Pro1357=)	Likely benign	Cerebral autosomal dominant arteriopathy with subcortical infarcts and leukoencephalopathy	24		ClinVar=328390
NOTCH3	4267	4191G>T	single nucleotide variant	NM_000435.2(NOTCH3):c.4191G>T (p.Gly1397=)	Likely benign	not specified	24		ClinVar=256136
NOTCH3	4424	4348G>A	single nucleotide variant	NM_000435.2(NOTCH3):c.4348G>A (p.Ala1450Thr)	Likely benign	Cerebral autosomal dominant arteriopathy with subcortical infarcts and leukoencephalopathy	24		ClinVar=328388
NOTCH3	4520	4444G>C	single nucleotide variant	NM_000435.2(NOTCH3):c.4444G>C (p.Gly1482Arg)	Likely benign	Cerebral autosomal dominant arteriopathy with subcortical infarcts and leukoencephalopathy	25		ClinVar=328385
NOTCH3	4628	4552C>A	single nucleotide variant	NM_000435.2(NOTCH3):c.4552C>A (p.Leu1518Met)	Likely benign	Cerebral autosomal dominant arteriopathy with subcortical infarcts and leukoencephalopathy	25		ClinVar=256137
NOTCH3	4639	4563A>G	single nucleotide variant	NM_000435.2(NOTCH3):c.4563A>G (p.Pro1521=)	Benign	Cerebral autosomal dominant arteriopathy with subcortical infarcts and leukoencephalopathy	25		ClinVar=256138
NOTCH3	4755	4679G>C	single nucleotide variant	NM_000435.2(NOTCH3):c.4679G>C (p.Arg1560Pro)	Benign	Cerebral autosomal dominant arteriopathy with subcortical infarcts and leukoencephalopathy	25		ClinVar=256139
NOTCH3	5438	5362+3T>C	single nucleotide variant	NM_000435.2(NOTCH3):c.5362+3T>C	Benign	Cerebral autosomal dominant arteriopathy with subcortical infarcts and leukoencephalopathy	29		ClinVar=256140
NOTCH3	5439	5363-17C>T	single nucleotide variant	NM_000435.2(NOTCH3):c.5363-17C>T	Benign	not specified	30		ClinVar=256141
NOTCH3	5446	5370C>T	single nucleotide variant	NM_000435.2(NOTCH3):c.5370C>T (p.Phe1790=)	Benign	Cerebral autosomal dominant arteriopathy with subcortical infarcts and leukoencephalopathy	30		ClinVar=256142
NOTCH3	5452	5376G>A	single nucleotide variant	NM_000435.2(NOTCH3):c.5376G>A (p.Pro1792=)	Likely benign	Cerebral autosomal dominant arteriopathy with subcortical infarcts and leukoencephalopathy	30		ClinVar=328383
NOTCH3	5476	5400G>T	single nucleotide variant	NM_000435.2(NOTCH3):c.5400G>T (p.Gly1800=)	Benign	Cerebral autosomal dominant arteriopathy with subcortical infarcts and leukoencephalopathy	30		ClinVar=256143
NOTCH3	5542	5466C>T	single nucleotide variant	NM_000435.2(NOTCH3):c.5466C>T (p.Ser1822=)	Likely benign	Cerebral autosomal dominant arteriopathy with subcortical infarcts and leukoencephalopathy	30		ClinVar=328382
NOTCH3	5577	5501G>A	single nucleotide variant	NM_000435.2(NOTCH3):c.5501G>A (p.Arg1834Gln)	Likely benign	Cerebral autosomal dominant arteriopathy with subcortical infarcts and leukoencephalopathy	30		ClinVar=328381
NOTCH3	5602	5526T>C	single nucleotide variant	NM_000435.2(NOTCH3):c.5526T>C (p.Ala1842=)	Benign	Cerebral autosomal dominant arteriopathy with subcortical infarcts and leukoencephalopathy	30		ClinVar=256144
NOTCH3	5744	5668-11C>T	single nucleotide variant	NM_000435.2(NOTCH3):c.5668-11C>T	Likely benign	Cerebral autosomal dominant arteriopathy with subcortical infarcts and leukoencephalopathy	31		ClinVar=328379
NOTCH3	5892	5816-8T>C	single nucleotide variant	NM_000435.2(NOTCH3):c.5816-8T>C	Benign	Cerebral autosomal dominant arteriopathy with subcortical infarcts and leukoencephalopathy	32		ClinVar=256145
NOTCH3	5930	5854G>A	single nucleotide variant	NM_000435.2(NOTCH3):c.5854G>A (p.Val1952Met)	Benign	Cerebral autosomal dominant arteriopathy with subcortical infarcts and leukoencephalopathy	32		ClinVar=256146
NOTCH3	6107	6031G>A	single nucleotide variant	NM_000435.2(NOTCH3):c.6031G>A (p.Val2011Ile)	Benign	Cerebral autosomal dominant arteriopathy with subcortical infarcts and leukoencephalopathy	33		ClinVar=256147
NOTCH3	6178	6102C>T	single nucleotide variant	NM_000435.2(NOTCH3):c.6102C>T (p.Pro2034=)	Benign	Cerebral autosomal dominant arteriopathy with subcortical infarcts and leukoencephalopathy	33		ClinVar=256149
NOTCH3	6242	6166G>A	single nucleotide variant	NM_000435.2(NOTCH3):c.6166G>A (p.Ala2056Thr)	Likely benign	Cerebral autosomal dominant arteriopathy with subcortical infarcts and leukoencephalopathy	33		ClinVar=328374
NOTCH3	6297	6221C>T	single nucleotide variant	NM_000435.2(NOTCH3):c.6221C>T (p.Pro2074Leu)	Benign	Cerebral autosomal dominant arteriopathy with subcortical infarcts and leukoencephalopathy	33		ClinVar=256150
NOTCH3	6514	6438G>A	single nucleotide variant	NM_000435.2(NOTCH3):c.6438G>A (p.Ala2146=)	Benign	Cerebral autosomal dominant arteriopathy with subcortical infarcts and leukoencephalopathy	33		ClinVar=256151
NOTCH3	6608	6532C>T	single nucleotide variant	NM_000435.2(NOTCH3):c.6532C>T (p.Pro2178Ser)	Likely benign	Cerebral autosomal dominant arteriopathy with subcortical infarcts and leukoencephalopathy	33		ClinVar=328372
NOTCH3	6687	6611C>T	single nucleotide variant	NM_000435.2(NOTCH3):c.6611C>T (p.Pro2204Leu)	Likely benign	Cerebral autosomal dominant arteriopathy with subcortical infarcts and leukoencephalopathy	33		ClinVar=328371
NOTCH3	6744	6668C>T	single nucleotide variant	NM_000435.2(NOTCH3):c.6668C>T (p.Ala2223Val)	Benign	Cerebral autosomal dominant arteriopathy with subcortical infarcts and leukoencephalopathy	33		ClinVar=256152
NOTCH3	6829	6753C>T	single nucleotide variant	NM_000435.2(NOTCH3):c.6753C>T (p.Ser2251=)	Benign	Cerebral autosomal dominant arteriopathy with subcortical infarcts and leukoencephalopathy	33		ClinVar=256153
NOTCH3	6889	6813T>C	single nucleotide variant	NM_000435.2(NOTCH3):c.6813T>C (p.Pro2271=)	Benign	Cerebral autosomal dominant arteriopathy with subcortical infarcts and leukoencephalopathy	33		ClinVar=256154
NOTCH3	NA		single nucleotide variant	NM_000435.2(NOTCH3):c.*23T>A	Likely benign	Cerebral autosomal dominant arteriopathy with subcortical infarcts and leukoencephalopathy	0		ClinVar=328370
NOTCH3	NA		single nucleotide variant	NM_000435.2(NOTCH3):c.*96C>T	Likely benign	Cerebral autosomal dominant arteriopathy with subcortical infarcts and leukoencephalopathy	0		ClinVar=328369
NOTCH3	NA		single nucleotide variant	NM_000435.2(NOTCH3):c.*338A>C	Benign	Cerebral autosomal dominant arteriopathy with subcortical infarcts and leukoencephalopathy	0		ClinVar=328368
NOTCH3	NA		single nucleotide variant	NM_000435.2(NOTCH3):c.*370A>G	Likely benign	Cerebral autosomal dominant arteriopathy with subcortical infarcts and leukoencephalopathy	0		ClinVar=328366
NOTCH3	NA		single nucleotide variant	NM_000435.2(NOTCH3):c.*544C>T	Likely benign	Cerebral autosomal dominant arteriopathy with subcortical infarcts and leukoencephalopathy	0		ClinVar=328364
NOTCH3	NA		single nucleotide variant	NM_000435.2(NOTCH3):c.*563T>C	Likely benign	Cerebral autosomal dominant arteriopathy with subcortical infarcts and leukoencephalopathy	0		ClinVar=328363
NOTCH3	NA		single nucleotide variant	NM_000435.2(NOTCH3):c.*608C>T	Likely benign	Cerebral autosomal dominant arteriopathy with subcortical infarcts and leukoencephalopathy	0		ClinVar=328362
NOTCH3	NA		single nucleotide variant	NM_000435.2(NOTCH3):c.*668G>T	Benign	Cerebral autosomal dominant arteriopathy with subcortical infarcts and leukoencephalopathy	0		ClinVar=328361
NOTCH3	NA		single nucleotide variant	NM_000435.2(NOTCH3):c.*808G>A	Benign	Cerebral autosomal dominant arteriopathy with subcortical infarcts and leukoencephalopathy	0		ClinVar=328360
NOTCH3	NA		single nucleotide variant	NM_000435.2(NOTCH3):c.*837G>A	Benign	Cerebral autosomal dominant arteriopathy with subcortical infarcts and leukoencephalopathy	0		ClinVar=328359
NOTCH3	NA		single nucleotide variant	NM_000435.2(NOTCH3):c.*890C>T	Benign	Cerebral autosomal dominant arteriopathy with subcortical infarcts and leukoencephalopathy	0		ClinVar=328357
NOTCH3	NA		single nucleotide variant	NM_000435.2(NOTCH3):c.*937T>C	Likely benign	Cerebral autosomal dominant arteriopathy with subcortical infarcts and leukoencephalopathy	0		ClinVar=328356
SERPINE1	206	49G>A	single nucleotide variant	NM_000602.4(SERPINE1):c.49G>A (p.Val17Ile)	Likely benign	Plasminogen activator inhibitor type 1 deficiency	2		ClinVar=358307
SERPINE1	712	555G>C	single nucleotide variant	NM_000602.4(SERPINE1):c.555G>C (p.Arg185=)	Likely benign	Plasminogen activator inhibitor type 1 deficiency	4		ClinVar=358311
SERPINE1	832	c.-675del	Deletion	c.-675del	Pathogenic	Primary pulmonary hypertension	4	PMID: 20300292	Manual Annotation
SERPINE1	NA		single nucleotide variant	NM_000602.4(SERPINE1):c.*1737G>A	Benign	Plasminogen activator inhibitor type 1 deficiency	0		ClinVar=358338
SERPINE1	NA		single nucleotide variant	NM_000602.4(SERPINE1):c.*1358T>C	Likely benign	Plasminogen activator inhibitor type 1 deficiency	0		ClinVar=358333
SERPINE1	NA		single nucleotide variant	NM_000602.4(SERPINE1):c.*1186C>T	Likely benign	Plasminogen activator inhibitor type 1 deficiency	0		ClinVar=358329
SERPINE1	NA		Duplication	NM_000602.4(SERPINE1):c.*997_*1005dupCCGCGCCCC	Benign	Plasminogen activator inhibitor type 1 deficiency	0		ClinVar=358325
SERPINE1	NA		single nucleotide variant	NM_000602.4(SERPINE1):c.*892G>A	Likely benign	Plasminogen activator inhibitor type 1 deficiency	0		ClinVar=358323
SERPINE1	NA		single nucleotide variant	NM_000602.4(SERPINE1):c.*752C>A	Likely benign	Plasminogen activator inhibitor type 1 deficiency	0		ClinVar=358320
SERPINE1	NA		single nucleotide variant	NM_000602.4(SERPINE1):c.*722T>G	Benign	Plasminogen activator inhibitor type 1 deficiency	0		ClinVar=358319
SERPINE1	NA		single nucleotide variant	NM_000602.4(SERPINE1):c.*690T>C	Likely benign	Plasminogen activator inhibitor type 1 deficiency	0		ClinVar=358318
SERPINE1	NA		single nucleotide variant	NM_000602.4(SERPINE1):c.*361T>C	Benign	Plasminogen activator inhibitor type 1 deficiency	0		ClinVar=358316
SIRT3	656	c.622G>A	single nucleotide variant	c.622G>A	Pathogenic	Primary pulmonary hypertension	3	PMID: 25284742	Manual Annotation
SMAD4	403	-135G>A	single nucleotide variant	NM_005359.5(SMAD4):c.-135G>A	Likely benign	not specified	0		ClinVar=392894
SMAD4	405	-133G>A	single nucleotide variant	NM_005359.5(SMAD4):c.-133G>A	Likely benign	not specified	0		ClinVar=388624
SMAD4	410	-128+16_-128+18delCCCinsTT	Indel	NM_005359.5(SMAD4):c.-128+16_-128+18delCCCinsTT	Likely benign	not specified	0		ClinVar=420335
SMAD4	410	-128+1995A>G	single nucleotide variant	NM_005359.5(SMAD4):c.-128+1995A>G	Likely benign	Hereditary cancer-predisposing syndrome	0		ClinVar=224033
SMAD4	410	-128+759G>A	single nucleotide variant	NM_005359.5(SMAD4):c.-128+759G>A	Likely benign	Hereditary cancer-predisposing syndrome	0		ClinVar=224026
SMAD4	410	-128+540A>G	single nucleotide variant	NM_005359.5(SMAD4):c.-128+540A>G	Likely benign	Hereditary cancer-predisposing syndrome	0		ClinVar=224023
SMAD4	410	-128+263G>C	single nucleotide variant	NM_005359.5(SMAD4):c.-128+263G>C	Likely benign	Hereditary cancer-predisposing syndrome	0		ClinVar=224021
SMAD4	410	-128+3139C>T	single nucleotide variant	NM_005359.5(SMAD4):c.-128+3139C>T	Likely benign	Hereditary cancer-predisposing syndrome	0		ClinVar=224016
SMAD4	411	-127-3T>A	single nucleotide variant	NM_005359.5(SMAD4):c.-127-3T>A	Likely benign	not specified	0		ClinVar=382523
SMAD4	411	-127-?_*6575+?dup	Duplication	NM_005359.5(SMAD4):c.-127-?_*6575+?dup	Likely benign	Juvenile polyposis syndrome	0		ClinVar=240139
SMAD4	411	-127-4838G>A	single nucleotide variant	NM_005359.5(SMAD4):c.-127-4838G>A	Likely benign	Hereditary cancer-predisposing syndrome	0		ClinVar=224029
SMAD4	411	-127-4835G>A	single nucleotide variant	NM_005359.5(SMAD4):c.-127-4835G>A	Likely benign	Hereditary cancer-predisposing syndrome	0		ClinVar=224027
SMAD4	411	-127-3318A>G	single nucleotide variant	NM_005359.5(SMAD4):c.-127-3318A>G	Likely benign	Hereditary cancer-predisposing syndrome	0		ClinVar=224022
SMAD4	411	-127-135A>C	single nucleotide variant	NM_005359.5(SMAD4):c.-127-135A>C	Likely benign	Hereditary cancer-predisposing syndrome	0		ClinVar=224020
SMAD4	485	-53_-48delAATTGC	Deletion	NM_005359.5(SMAD4):c.-53_-48delAATTGC	Likely benign	not specified	0		ClinVar=422097
SMAD4	499	-39T>A	single nucleotide variant	NM_005359.5(SMAD4):c.-39T>A	Likely benign	not specified	0		ClinVar=390388
SMAD4	510	-28T>C	single nucleotide variant	NM_005359.5(SMAD4):c.-28T>C	Likely benign	not specified	0		ClinVar=389873
SMAD4	518	-20A>C	single nucleotide variant	NM_005359.5(SMAD4):c.-20A>C	Likely benign	not specified	0		ClinVar=380201
SMAD4	527	-11A>C	single nucleotide variant	NM_005359.5(SMAD4):c.-11A>C	Likely benign	not specified	0		ClinVar=385850
SMAD4	559	21G>A	single nucleotide variant	NM_005359.5(SMAD4):c.21G>A (p.Thr7=)	Likely benign	Juvenile polyposis syndrome	2		ClinVar=183887
SMAD4	576	c.38A>G, p.N13S	single nucleotide variant	c.38A>G, p.N13S	Pathogenic	Primary pulmonary hypertension	2	PMID: 21898662	Manual Annotation
SMAD4	598	60G>A	single nucleotide variant	NM_005359.5(SMAD4):c.60G>A (p.Val20=)	Likely benign	not specified	2		ClinVar=378972
SMAD4	628	90A>G	single nucleotide variant	NM_005359.5(SMAD4):c.90A>G (p.Gly30=)	Likely benign	Hereditary cancer-predisposing syndrome	2		ClinVar=233358
SMAD4	640	102A>G	single nucleotide variant	NM_005359.5(SMAD4):c.102A>G (p.Thr34=)	Likely benign	Juvenile polyposis syndrome	2		ClinVar=183699
SMAD4	664	126T>C	single nucleotide variant	NM_005359.5(SMAD4):c.126T>C (p.Ser42=)	Likely benign	not specified	2		ClinVar=388467
SMAD4	665	c.127A>G, p.K43E	single nucleotide variant	c.127A>G, p.K43E	Pathogenic	Primary pulmonary hypertension	2	PMID: 21898662	Manual Annotation
SMAD4	670	132A>G	single nucleotide variant	NM_005359.5(SMAD4):c.132A>G (p.Val44=)	Likely benign	Juvenile polyposis syndrome	2		ClinVar=382652
SMAD4	682	144G>A	single nucleotide variant	NM_005359.5(SMAD4):c.144G>A (p.Lys48=)	Likely benign	not specified	2		ClinVar=389462
SMAD4	715	177A>G	single nucleotide variant	NM_005359.5(SMAD4):c.177A>G (p.Thr59=)	Likely benign	Juvenile polyposis syndrome	2		ClinVar=240147
SMAD4	721	183A>C	single nucleotide variant	NM_005359.5(SMAD4):c.183A>C (p.Ile61=)	Likely benign	Juvenile polyposis syndrome	2		ClinVar=240148
SMAD4	766	228A>G	single nucleotide variant	NM_005359.5(SMAD4):c.228A>G (p.Arg76=)	Likely benign	Juvenile polyposis syndrome	2		ClinVar=132767
SMAD4	769	231A>G	single nucleotide variant	NM_005359.5(SMAD4):c.231A>G (p.Thr77=)	Likely benign	Hereditary cancer-predisposing syndrome	2		ClinVar=183926
SMAD4	787	249+9T>C	single nucleotide variant	NM_005359.5(SMAD4):c.249+9T>C	Likely benign	Juvenile polyposis syndrome	2		ClinVar=372022
SMAD4	788	250-15C>T	single nucleotide variant	NM_005359.5(SMAD4):c.250-15C>T	Likely benign	not specified	3		ClinVar=378623
SMAD4	788	250-589A>G	single nucleotide variant	NM_005359.5(SMAD4):c.250-589A>G	Likely benign	Hereditary cancer-predisposing syndrome	3		ClinVar=224025
SMAD4	799	261G>A	single nucleotide variant	NM_005359.5(SMAD4):c.261G>A (p.Arg87=)	Likely benign	not specified	3		ClinVar=380485
SMAD4	814	276T>C	single nucleotide variant	NM_005359.5(SMAD4):c.276T>C (p.His92=)	Likely benign	Hereditary cancer-predisposing syndrome	3		ClinVar=183782
SMAD4	880	342T>C	single nucleotide variant	NM_005359.5(SMAD4):c.342T>C (p.Tyr114=)	Likely benign	Juvenile polyposis syndrome	3		ClinVar=240149
SMAD4	892	354G>A	single nucleotide variant	NM_005359.5(SMAD4):c.354G>A (p.Ala118=)	Benign	Myhre syndrome	3	PMID:16436638	ClinVar=24799
SMAD4	904	366A>G	single nucleotide variant	NM_005359.5(SMAD4):c.366A>G (p.Lys122=)	Likely benign	not specified	3		ClinVar=392789
SMAD4	907	369T>C	single nucleotide variant	NM_005359.5(SMAD4):c.369T>C (p.Cys123=)	Likely benign	Juvenile polyposis syndrome	3		ClinVar=230174
SMAD4	913	375T>C	single nucleotide variant	NM_005359.5(SMAD4):c.375T>C (p.Ser125=)	Likely benign	Juvenile polyposis syndrome	3		ClinVar=215843
SMAD4	925	387T>C	single nucleotide variant	NM_005359.5(SMAD4):c.387T>C (p.Asn129=)	Likely benign	not specified	3		ClinVar=385768
SMAD4	937	399C>T	single nucleotide variant	NM_005359.5(SMAD4):c.399C>T (p.Tyr133=)	Likely benign	Juvenile polyposis syndrome	3		ClinVar=413433
SMAD4	949	411A>G	single nucleotide variant	NM_005359.5(SMAD4):c.411A>G (p.Val137=)	Likely benign	not specified	3		ClinVar=378624
SMAD4	962	424+12_424+13delTT	Deletion	NM_005359.5(SMAD4):c.424+12_424+13delTT	Likely benign	not specified	3		ClinVar=422871
SMAD4	962	424+14G>A	single nucleotide variant	NM_005359.5(SMAD4):c.424+14G>A	Likely benign	not specified	3		ClinVar=391022
SMAD4	962	424+165A>G	single nucleotide variant	NM_005359.5(SMAD4):c.424+165A>G	Likely benign	Hereditary cancer-predisposing syndrome	3		ClinVar=224037
SMAD4	992	454+291T>A	single nucleotide variant	NM_005359.5(SMAD4):c.454+291T>A	Likely benign	Hereditary cancer-predisposing syndrome	4		ClinVar=224032
SMAD4	992	454+8A>T	single nucleotide variant	NM_005359.5(SMAD4):c.454+8A>T	Likely benign	Juvenile polyposis syndrome	4		ClinVar=219454
SMAD4	993	455-8C>T	single nucleotide variant	NM_005359.5(SMAD4):c.455-8C>T	Likely benign	not specified	5		ClinVar=378926
SMAD4	993	455-43A>T	single nucleotide variant	NM_005359.5(SMAD4):c.455-43A>T	Benign	not specified	5		ClinVar=259750
SMAD4	993	455-1921T>G	single nucleotide variant	NM_005359.5(SMAD4):c.455-1921T>G	Likely benign	Hereditary cancer-predisposing syndrome	5		ClinVar=224034
SMAD4	993	455-6A>G	single nucleotide variant	NM_005359.5(SMAD4):c.455-6A>G	Benign	Myhre syndrome	5		ClinVar=139218
SMAD4	1012	474G>A	single nucleotide variant	NM_005359.5(SMAD4):c.474G>A (p.Val158=)	Likely benign	Hereditary cancer-predisposing syndrome	5		ClinVar=185721
SMAD4	1021	483A>G	single nucleotide variant	NM_005359.5(SMAD4):c.483A>G (p.Glu161=)	Likely benign	Hereditary cancer-predisposing syndrome	5		ClinVar=183859
SMAD4	1024	486T>C	single nucleotide variant	NM_005359.5(SMAD4):c.486T>C (p.Tyr162=)	Likely benign	not specified	5		ClinVar=391104
SMAD4	1045	507G>A	single nucleotide variant	NM_005359.5(SMAD4):c.507G>A (p.Gln169=)	Likely benign	Hereditary cancer-predisposing syndrome	5		ClinVar=231885
SMAD4	1048	510A>G	single nucleotide variant	NM_005359.5(SMAD4):c.510A>G (p.Pro170=)	Likely benign	not specified	5		ClinVar=386414
SMAD4	1120	582A>G	single nucleotide variant	NM_005359.5(SMAD4):c.582A>G (p.Thr194=)	Likely benign	Juvenile polyposis syndrome	5		ClinVar=380411
SMAD4	1144	606C>G	single nucleotide variant	NM_005359.5(SMAD4):c.606C>G (p.Ala202=)	Likely benign	Juvenile polyposis syndrome	5		ClinVar=220122
SMAD4	1171	633T>C	single nucleotide variant	NM_005359.5(SMAD4):c.633T>C (p.Thr211=)	Likely benign	Juvenile polyposis syndrome	5		ClinVar=413438
SMAD4	1177	639C>T	single nucleotide variant	NM_005359.5(SMAD4):c.639C>T (p.Asn213=)	Likely benign	Juvenile polyposis syndrome	5		ClinVar=240151
SMAD4	1205	667+20G>T	single nucleotide variant	NM_005359.5(SMAD4):c.667+20G>T	Likely benign	not specified	5		ClinVar=391476
SMAD4	1205	667+17G>A	single nucleotide variant	NM_005359.5(SMAD4):c.667+17G>A	Likely benign	not specified	5		ClinVar=380355
SMAD4	1205	667+9T>C	single nucleotide variant	NM_005359.5(SMAD4):c.667+9T>C	Likely benign	Juvenile polyposis syndrome	5		ClinVar=378625
SMAD4	1205	667+54T>C	single nucleotide variant	NM_005359.5(SMAD4):c.667+54T>C	Likely benign	Hereditary cancer-predisposing syndrome	5		ClinVar=224028
SMAD4	1205	667+299T>C	single nucleotide variant	NM_005359.5(SMAD4):c.667+299T>C	Likely benign	Hereditary cancer-predisposing syndrome	5		ClinVar=224019
SMAD4	1206	668-7C>T	single nucleotide variant	NM_005359.5(SMAD4):c.668-7C>T	Likely benign	Juvenile polyposis syndrome	6		ClinVar=413441
SMAD4	1206	668-1111A>G	single nucleotide variant	NM_005359.5(SMAD4):c.668-1111A>G	Likely benign	Hereditary cancer-predisposing syndrome	6		ClinVar=224017
SMAD4	1231	693C>T	single nucleotide variant	NM_005359.5(SMAD4):c.693C>T (p.Gly231=)	Likely benign	Juvenile polyposis syndrome	6		ClinVar=215844
SMAD4	1325	787+15T>G	single nucleotide variant	NM_005359.5(SMAD4):c.787+15T>G	Likely benign	not specified	6		ClinVar=378626
SMAD4	1325	787+15T>C	single nucleotide variant	NM_005359.5(SMAD4):c.787+15T>C	Likely benign	not specified	6		ClinVar=224018
SMAD4	1326	788-12delC	Deletion	NM_005359.5(SMAD4):c.788-12delC	Likely benign	not specified	7		ClinVar=420249
SMAD4	1336	798C>T	single nucleotide variant	NM_005359.5(SMAD4):c.798C>T (p.Thr266=)	Likely benign	Hereditary cancer-predisposing syndrome	7		ClinVar=233821
SMAD4	1363	825A>G	single nucleotide variant	NM_005359.5(SMAD4):c.825A>G (p.Pro275=)	Likely benign	Juvenile polyposis syndrome	7		ClinVar=240154
SMAD4	1408	870C>T	single nucleotide variant	NM_005359.5(SMAD4):c.870C>T (p.His290=)	Likely benign	Juvenile polyposis syndrome	7		ClinVar=413442
SMAD4	1414	876G>A	single nucleotide variant	NM_005359.5(SMAD4):c.876G>A (p.Pro292=)	Likely benign	not specified	7		ClinVar=378973
SMAD4	1442	904+298T>C	single nucleotide variant	NM_005359.5(SMAD4):c.904+298T>C	Likely benign	Hereditary cancer-predisposing syndrome	7		ClinVar=224024
SMAD4	1443	905-19_905-17delTTT	Deletion	NM_005359.5(SMAD4):c.905-19_905-17delTTT	Likely benign	not specified	8		ClinVar=418500
SMAD4	1443	905-52A>G	single nucleotide variant	NM_005359.5(SMAD4):c.905-52A>G	Benign	Juvenile polyposis syndrome	8	PMID:Unpublished ARUP data	ClinVar=24817
SMAD4	1443	905-32T=	single nucleotide variant	NM_005359.5(SMAD4):c.905-32T=	Benign	Juvenile polyposis syndrome	8	PMID:16287957	ClinVar=24797
SMAD4	1447	909T>C	single nucleotide variant	NM_005359.5(SMAD4):c.909T>C (p.Pro303=)	Likely benign	Juvenile polyposis syndrome	8		ClinVar=413439
SMAD4	1459	921G>A	single nucleotide variant	NM_005359.5(SMAD4):c.921G>A (p.Glu307=)	Likely benign	Hereditary cancer-predisposing syndrome	8		ClinVar=233198
SMAD4	1462	924T>C	single nucleotide variant	NM_005359.5(SMAD4):c.924T>C (p.Leu308=)	Likely benign	Juvenile polyposis syndrome	8		ClinVar=220195
SMAD4	1493	955+15A>G	single nucleotide variant	NM_005359.5(SMAD4):c.955+15A>G	Likely benign	not specified	8		ClinVar=392038
SMAD4	1493	955+7G>A	single nucleotide variant	NM_005359.5(SMAD4):c.955+7G>A	Likely benign	Juvenile polyposis syndrome	8		ClinVar=219862
SMAD4	1494	956-5T>C	single nucleotide variant	NM_005359.5(SMAD4):c.956-5T>C	Likely benign	not specified	9		ClinVar=383541
SMAD4	1501	963G>A	single nucleotide variant	NM_005359.5(SMAD4):c.963G>A (p.Glu321=)	Likely benign	not specified	9		ClinVar=389876
SMAD4	1543	1005A>G	single nucleotide variant	NM_005359.5(SMAD4):c.1005A>G (p.Val335=)	Likely benign	Juvenile polyposis syndrome	9		ClinVar=240140
SMAD4	1552	1014A>G	single nucleotide variant	NM_005359.5(SMAD4):c.1014A>G (p.Thr338=)	Likely benign	not specified	9		ClinVar=378974
SMAD4	1597	1059C>T	single nucleotide variant	NM_005359.5(SMAD4):c.1059C>T (p.Tyr353=)	Likely benign	Juvenile polyposis syndrome	9		ClinVar=215842
SMAD4	1624	1086T>C	single nucleotide variant	NM_005359.5(SMAD4):c.1086T>C (p.Phe362=)	Benign	Myhre syndrome	9		ClinVar=132693
SMAD4	1663	1125C>T	single nucleotide variant	NM_005359.5(SMAD4):c.1125C>T (p.Ala375=)	Likely benign	Juvenile polyposis syndrome	9		ClinVar=413431
SMAD4	1678	1140-36_1140-19del18	Deletion	NM_005359.5(SMAD4):c.1140-36_1140-19del18	Likely benign	not specified	10		ClinVar=422185
SMAD4	1678	1140-10delT	Deletion	NM_005359.5(SMAD4):c.1140-10delT	Likely benign	not specified	10		ClinVar=420531
SMAD4	1678	1140G>A	single nucleotide variant	NM_005359.5(SMAD4):c.1140G>A (p.Arg380=)	Likely benign	Juvenile polyposis syndrome	10		ClinVar=413435
SMAD4	1678	1140-16C>A	single nucleotide variant	NM_005359.5(SMAD4):c.1140-16C>A	Likely benign	not specified	10		ClinVar=383557
SMAD4	1678	1140-4T>C	single nucleotide variant	NM_005359.5(SMAD4):c.1140-4T>C	Likely benign	not specified	10		ClinVar=381470
SMAD4	1678	1140-10T>C	single nucleotide variant	NM_005359.5(SMAD4):c.1140-10T>C	Benign	Juvenile polyposis syndrome	10		ClinVar=139219
SMAD4	1744	1206T>A	single nucleotide variant	NM_005359.5(SMAD4):c.1206T>A (p.Leu402=)	Likely benign	Juvenile polyposis syndrome	10		ClinVar=413430
SMAD4	1753	1215C>T	single nucleotide variant	NM_005359.5(SMAD4):c.1215C>T (p.His405=)	Likely benign	Juvenile polyposis syndrome	10		ClinVar=240144
SMAD4	1756	1218G>A	single nucleotide variant	NM_005359.5(SMAD4):c.1218G>A (p.Ala406=)	Likely benign	Juvenile polyposis syndrome	10		ClinVar=231979
SMAD4	1774	1236C>T	single nucleotide variant	NM_005359.5(SMAD4):c.1236C>T (p.Tyr412=)	Likely benign	not specified	10		ClinVar=385763
SMAD4	1786	1248A>G	single nucleotide variant	NM_005359.5(SMAD4):c.1248A>G (p.Arg416=)	Likely benign	Juvenile polyposis syndrome	10		ClinVar=185807
SMAD4	1846	1308+10A>G	single nucleotide variant	NM_005359.5(SMAD4):c.1308+10A>G	Likely benign	Juvenile polyposis syndrome	10		ClinVar=413432
SMAD4	1846	1308+9C>A	single nucleotide variant	NM_005359.5(SMAD4):c.1308+9C>A	Likely benign	not specified	10		ClinVar=384825
SMAD4	1846	1308+2398T>G	single nucleotide variant	NM_005359.5(SMAD4):c.1308+2398T>G	Likely benign	Hereditary cancer-predisposing syndrome	10		ClinVar=224036
SMAD4	1846	1308+4116C>T	single nucleotide variant	NM_005359.5(SMAD4):c.1308+4116C>T	Likely benign	Hereditary cancer-predisposing syndrome	10		ClinVar=224035
SMAD4	1846	1308+623C>T	single nucleotide variant	NM_005359.5(SMAD4):c.1308+623C>T	Likely benign	Hereditary cancer-predisposing syndrome	10		ClinVar=224031
SMAD4	1849	1311C>G	single nucleotide variant	NM_005359.5(SMAD4):c.1311C>G (p.Val437=)	Likely benign	Juvenile polyposis syndrome	11		ClinVar=413434
SMAD4	1909	1371A>G	single nucleotide variant	NM_005359.5(SMAD4):c.1371A>G (p.Ala457=)	Likely benign	Juvenile polyposis syndrome	11		ClinVar=413440
SMAD4	1930	1392C>T	single nucleotide variant	NM_005359.5(SMAD4):c.1392C>T (p.Ala464=)	Likely benign	Juvenile polyposis syndrome	11		ClinVar=132745
SMAD4	1933	1395G>A	single nucleotide variant	NM_005359.5(SMAD4):c.1395G>A (p.Val465=)	Likely benign	not specified	11		ClinVar=381943
SMAD4	1960	1422A>C	single nucleotide variant	NM_005359.5(SMAD4):c.1422A>C (p.Ser474=)	Likely benign	Juvenile polyposis syndrome	11		ClinVar=184070
SMAD4	1985	1447+9G>A	single nucleotide variant	NM_005359.5(SMAD4):c.1447+9G>A	Likely benign	Juvenile polyposis syndrome	11		ClinVar=240145
SMAD4	1986	1448-113T>C	single nucleotide variant	NM_005359.5(SMAD4):c.1448-113T>C	Likely benign	Hereditary cancer-predisposing syndrome	12		ClinVar=224030
SMAD4	1986	c.1448-6T>C	single nucleotide variant	c.1448-6T>C	Pathogenic	Primary pulmonary hypertension	12	PMID: 21898662	Manual Annotation
SMAD4	1999	1461T>A	single nucleotide variant	NM_005359.5(SMAD4):c.1461T>A (p.Ala487=)	Likely benign	Juvenile polyposis syndrome	12		ClinVar=184561
SMAD4	2030	1492T>C	single nucleotide variant	NM_005359.5(SMAD4):c.1492T>C (p.Leu498=)	Likely benign	Juvenile polyposis syndrome	12		ClinVar=379190
SMAD4	2071	1533G>A	single nucleotide variant	NM_005359.5(SMAD4):c.1533G>A (p.Pro511=)	Likely benign	not specified	12		ClinVar=391101
SMAD4	2092	1554C>T	single nucleotide variant	NM_005359.5(SMAD4):c.1554C>T (p.Ile518=)	Likely benign	Hereditary cancer-predisposing syndrome	12		ClinVar=233487
SMAD4	2134	1596C>T	single nucleotide variant	NM_005359.5(SMAD4):c.1596C>T (p.Ala532=)	Likely benign	Hereditary cancer-predisposing syndrome	12		ClinVar=233281
SMAD4	2144	1606C>T	single nucleotide variant	NM_005359.5(SMAD4):c.1606C>T (p.Leu536=)	Likely benign	Juvenile polyposis syndrome	12		ClinVar=136073
SMAD4	2149	1611C>T	single nucleotide variant	NM_005359.5(SMAD4):c.1611C>T (p.Asp537=)	Likely benign	Juvenile polyposis syndrome	12		ClinVar=378975
SMAD4	2170	1632G>A	single nucleotide variant	NM_005359.5(SMAD4):c.1632G>A (p.Pro544=)	Likely benign	Juvenile polyposis syndrome	12		ClinVar=413437
SMAD4	2179	1641C>T	single nucleotide variant	NM_005359.5(SMAD4):c.1641C>T (p.Asp547=)	Likely benign	not specified	12		ClinVar=389140
SMAD4	2185	1647A>G	single nucleotide variant	NM_005359.5(SMAD4):c.1647A>G (p.Gln549=)	Likely benign	Juvenile polyposis syndrome	12		ClinVar=231980
SMAD4	2191	1653A>G	single nucleotide variant	NM_005359.5(SMAD4):c.1653A>G (p.Leu551=)	Likely benign	Juvenile polyposis syndrome	12		ClinVar=136074
SMAD4	NA		single nucleotide variant	NM_005359.5(SMAD4):c.*12G>A	Likely benign	not specified	0		ClinVar=379499
SMAD4	NA		single nucleotide variant	NM_005359.5(SMAD4):c.*6588C>G	Likely benign	Myhre syndrome	0		ClinVar=369252
SMAD4	NA		single nucleotide variant	NM_005359.5(SMAD4):c.*6586C>T	Likely benign	Myhre syndrome	0		ClinVar=369251
SMAD4	NA		single nucleotide variant	NM_005359.5(SMAD4):c.*6513C>T	Likely benign	Myhre syndrome	0		ClinVar=327219
SMAD4	NA		single nucleotide variant	NM_005359.5(SMAD4):c.*6492A>T	Likely benign	Myhre syndrome	0		ClinVar=327218
SMAD4	NA		single nucleotide variant	NM_005359.5(SMAD4):c.*6423G>C	Benign	Myhre syndrome	0		ClinVar=327217
SMAD4	NA		Deletion	NM_005359.5(SMAD4):c.*6353delT	Likely benign	Myhre syndrome	0		ClinVar=327215
SMAD4	NA		single nucleotide variant	NM_005359.5(SMAD4):c.*6009G>C	Likely benign	Myhre syndrome	0		ClinVar=327212
SMAD4	NA		single nucleotide variant	NM_005359.5(SMAD4):c.*5994A>C	Benign	Myhre syndrome	0		ClinVar=327211
SMAD4	NA		Deletion	NM_005359.5(SMAD4):c.*5863_*5867delGAAAA	Benign	Myhre syndrome	0		ClinVar=327208
SMAD4	NA		single nucleotide variant	NM_005359.5(SMAD4):c.*5801T>C	Likely benign	Myhre syndrome	0		ClinVar=327207
SMAD4	NA		Deletion	NM_005359.5(SMAD4):c.*5691_*5693delTAT	Benign	Myhre syndrome	0		ClinVar=327204
SMAD4	NA		Deletion	NM_005359.5(SMAD4):c.*5637_*5640delACAC	Benign	Myhre syndrome	0		ClinVar=327203
SMAD4	NA		single nucleotide variant	NM_005359.5(SMAD4):c.*5627G>A	Likely benign	Myhre syndrome	0		ClinVar=327202
SMAD4	NA		single nucleotide variant	NM_005359.5(SMAD4):c.*5535A>G	Benign	Myhre syndrome	0		ClinVar=327187
SMAD4	NA		single nucleotide variant	NM_005359.5(SMAD4):c.*5419T>C	Likely benign	Myhre syndrome	0		ClinVar=327179
SMAD4	NA		single nucleotide variant	NM_005359.5(SMAD4):c.*5259A>T	Likely benign	Myhre syndrome	0		ClinVar=327178
SMAD4	NA		single nucleotide variant	NM_005359.5(SMAD4):c.*5170C>T	Likely benign	Myhre syndrome	0		ClinVar=327176
SMAD4	NA		single nucleotide variant	NM_005359.5(SMAD4):c.*5131A>G	Benign	Myhre syndrome	0		ClinVar=327175
SMAD4	NA		single nucleotide variant	NM_005359.5(SMAD4):c.*5083G>A	Likely benign	Myhre syndrome	0		ClinVar=327173
SMAD4	NA		single nucleotide variant	NM_005359.5(SMAD4):c.*5080A>G	Likely benign	Myhre syndrome	0		ClinVar=327172
SMAD4	NA		Duplication	NM_005359.5(SMAD4):c.*4867dupT	Likely benign	Myhre syndrome	0		ClinVar=327168
SMAD4	NA		single nucleotide variant	NM_005359.5(SMAD4):c.*4862A>G	Likely benign	Myhre syndrome	0		ClinVar=327167
SMAD4	NA		single nucleotide variant	NM_005359.5(SMAD4):c.*4748C>T	Likely benign	Myhre syndrome	0		ClinVar=327166
SMAD4	NA		single nucleotide variant	NM_005359.5(SMAD4):c.*4643T>C	Likely benign	Myhre syndrome	0		ClinVar=327165
SMAD4	NA		Deletion	NM_005359.5(SMAD4):c.*4587_*4590delGAGA	Likely benign	Myhre syndrome	0		ClinVar=327164
SMAD4	NA		single nucleotide variant	NM_005359.5(SMAD4):c.*4378T>G	Likely benign	Myhre syndrome	0		ClinVar=327163
SMAD4	NA		Duplication	NM_005359.5(SMAD4):c.*3878dupT	Likely benign	Myhre syndrome	0		ClinVar=327161
SMAD4	NA		single nucleotide variant	NM_005359.5(SMAD4):c.*3763C>T	Likely benign	Myhre syndrome	0		ClinVar=327159
SMAD4	NA		single nucleotide variant	NM_005359.5(SMAD4):c.*3398A>G	Likely benign	Myhre syndrome	0		ClinVar=327156
SMAD4	NA		single nucleotide variant	NM_005359.5(SMAD4):c.*2989A>G	Likely benign	Myhre syndrome	0		ClinVar=327152
SMAD4	NA		Deletion	NM_005359.5(SMAD4):c.*2968delT	Likely benign	Myhre syndrome	0		ClinVar=327151
SMAD4	NA		single nucleotide variant	NM_005359.5(SMAD4):c.*2914C>T	Likely benign	Myhre syndrome	0		ClinVar=327149
SMAD4	NA		single nucleotide variant	NM_005359.5(SMAD4):c.*2796G>T	Likely benign	Myhre syndrome	0		ClinVar=327148
SMAD4	NA		single nucleotide variant	NM_005359.5(SMAD4):c.*2488T>A	Likely benign	Myhre syndrome	0		ClinVar=327141
SMAD4	NA		single nucleotide variant	NM_005359.5(SMAD4):c.*2361A>G	Likely benign	Myhre syndrome	0		ClinVar=327139
SMAD4	NA		single nucleotide variant	NM_005359.5(SMAD4):c.*2353C>T	Likely benign	Myhre syndrome	0		ClinVar=327137
SMAD4	NA		single nucleotide variant	NM_005359.5(SMAD4):c.*2122A>G	Likely benign	Myhre syndrome	0		ClinVar=327136
SMAD4	NA		single nucleotide variant	NM_005359.5(SMAD4):c.*1866A>G	Likely benign	Myhre syndrome	0		ClinVar=327135
SMAD4	NA		single nucleotide variant	NM_005359.5(SMAD4):c.*1864C>A	Likely benign	Myhre syndrome	0		ClinVar=327134
SMAD4	NA		single nucleotide variant	NM_005359.5(SMAD4):c.*1820T>G	Likely benign	Myhre syndrome	0		ClinVar=327133
SMAD4	NA		single nucleotide variant	NM_005359.5(SMAD4):c.*1812T>G	Likely benign	Myhre syndrome	0		ClinVar=327132
SMAD4	NA		single nucleotide variant	NM_005359.5(SMAD4):c.*1187A>G	Likely benign	Myhre syndrome	0		ClinVar=327126
SMAD4	NA		single nucleotide variant	NM_005359.5(SMAD4):c.*1179T>C	Likely benign	Myhre syndrome	0		ClinVar=327125
SMAD4	NA		Deletion	NM_005359.5(SMAD4):c.*1169_*1173delCCATC	Likely benign	Myhre syndrome	0		ClinVar=327123
SMAD4	NA		single nucleotide variant	NM_005359.5(SMAD4):c.*1067G>A	Likely benign	Myhre syndrome	0		ClinVar=327122
SMAD4	NA		single nucleotide variant	NM_005359.5(SMAD4):c.*685A>C	Benign	Myhre syndrome	0		ClinVar=327119
SMAD4	NA		single nucleotide variant	NM_005359.5(SMAD4):c.*412A>G	Likely benign	Myhre syndrome	0		ClinVar=327118
SMAD4	NA		single nucleotide variant	NM_005359.5(SMAD4):c.*334C>T	Likely benign	Myhre syndrome	0		ClinVar=327117
SMAD4	NA		single nucleotide variant	NM_005359.5(SMAD4):c.*11C>T	Benign	Myhre syndrome	0		ClinVar=139220
SMAD4	NA		Duplication	NM_005359.5(SMAD4):c.(?_-1)_249+?dup	Likely benign	Juvenile polyposis syndrome	0		ClinVar=136071
SMAD9	82	-261_-256delCGCTGC	Deletion	NM_001127217.2(SMAD9):c.-261_-256delCGCTGC	Likely benign	Primary pulmonary hypertension	0		ClinVar=311917
SMAD9	85	-258T>C	single nucleotide variant	NM_001127217.2(SMAD9):c.-258T>C	Benign	Primary pulmonary hypertension	0		ClinVar=311919
SMAD9	293	-50G>A	single nucleotide variant	NM_001127217.2(SMAD9):c.-50G>A	Likely benign	Primary pulmonary hypertension	0		ClinVar=311908
SMAD9	306	-37C>T	single nucleotide variant	NM_001127217.2(SMAD9):c.-37C>T	Benign	Primary pulmonary hypertension	0		ClinVar=213809
SMAD9	355	12C>T	single nucleotide variant	NM_001127217.2(SMAD9):c.12C>T (p.Thr4=)	Benign	Primary pulmonary hypertension	2		ClinVar=227076
SMAD9	391	48C>T	single nucleotide variant	NM_001127217.2(SMAD9):c.48C>T (p.Pro16=)	Likely benign	Primary pulmonary hypertension	2		ClinVar=227954
SMAD9	670	327G>A	single nucleotide variant	NM_001127217.2(SMAD9):c.327G>A (p.Pro109=)	Likely benign	Primary pulmonary hypertension	2		ClinVar=311906
SMAD9	691	348A>G	single nucleotide variant	NM_001127217.2(SMAD9):c.348A>G (p.Pro116=)	Likely benign	Primary pulmonary hypertension	2		ClinVar=311905
SMAD9	777	434C>A	single nucleotide variant	NM_001127217.2(SMAD9):c.434C>A (p.Pro145Gln)	Likely benign	Primary pulmonary hypertension	3		ClinVar=311904
SMAD9	830	487G>A	single nucleotide variant	NM_001127217.2(SMAD9):c.487G>A (p.Ala163Thr)	Likely benign	Primary pulmonary hypertension	3		ClinVar=213810
SMAD9	1086	743C>A	single nucleotide variant	NM_001127217.2(SMAD9):c.743C>A (p.Thr248Lys)	Likely benign	Primary pulmonary hypertension	4		ClinVar=311902
SMAD9	1099	756T>C	single nucleotide variant	NM_001127217.2(SMAD9):c.756T>C (p.His252=)	Benign	Primary pulmonary hypertension	4		ClinVar=227077
SMAD9	1171	828C>T	single nucleotide variant	NM_001127217.2(SMAD9):c.828C>T (p.Val276=)	Likely benign	Primary pulmonary hypertension	5		ClinVar=311901
SMAD9	1347	1004-6C>T	single nucleotide variant	NM_001127217.2(SMAD9):c.1004-6C>T	Likely benign	not specified	6		ClinVar=390833
SMAD9	1378	1035G>A	single nucleotide variant	NM_001127217.2(SMAD9):c.1035G>A (p.Val345=)	Likely benign	Primary pulmonary hypertension	6		ClinVar=311897
SMAD9	NA		single nucleotide variant	NM_001127217.2(SMAD9):c.*47G>A	Likely benign	Primary pulmonary hypertension	0		ClinVar=311892
SMAD9	NA		single nucleotide variant	NM_001127217.2(SMAD9):c.*118C>T	Likely benign	Primary pulmonary hypertension	0		ClinVar=311890
SMAD9	NA		single nucleotide variant	NM_001127217.2(SMAD9):c.*200A>C	Benign	Primary pulmonary hypertension	0		ClinVar=311889
SMAD9	NA		single nucleotide variant	NM_001127217.2(SMAD9):c.*298A>G	Benign	Primary pulmonary hypertension	0		ClinVar=311888
SMAD9	NA		Duplication	NM_001127217.2(SMAD9):c.*382dupT	Likely benign	Primary pulmonary hypertension	0		ClinVar=311885
SMAD9	NA		single nucleotide variant	NM_001127217.2(SMAD9):c.*396A>G	Benign	Primary pulmonary hypertension	0		ClinVar=311884
SMAD9	NA		Deletion	NM_001127217.2(SMAD9):c.*435delC	Benign	Primary pulmonary hypertension	0		ClinVar=311883
SMAD9	NA		single nucleotide variant	NM_001127217.2(SMAD9):c.*557T>C	Likely benign	Primary pulmonary hypertension	0		ClinVar=311881
SMAD9	NA		single nucleotide variant	NM_001127217.2(SMAD9):c.*573T>C	Likely benign	Primary pulmonary hypertension	0		ClinVar=311880
SMAD9	NA		single nucleotide variant	NM_001127217.2(SMAD9):c.*590T>A	Likely benign	Primary pulmonary hypertension	0		ClinVar=311879
SMAD9	NA		single nucleotide variant	NM_001127217.2(SMAD9):c.*615A>G	Benign	Primary pulmonary hypertension	0		ClinVar=311878
SMAD9	NA		single nucleotide variant	NM_001127217.2(SMAD9):c.*637C>T	Benign	Primary pulmonary hypertension	0		ClinVar=311876
SMAD9	NA		single nucleotide variant	NM_001127217.2(SMAD9):c.*793C>G	Likely benign	Primary pulmonary hypertension	0		ClinVar=311872
SMAD9	NA		single nucleotide variant	NM_001127217.2(SMAD9):c.*850C>T	Likely benign	Primary pulmonary hypertension	0		ClinVar=311870
SMAD9	NA		single nucleotide variant	NM_001127217.2(SMAD9):c.*870T>C	Likely benign	Primary pulmonary hypertension	0		ClinVar=311869
SMAD9	NA		single nucleotide variant	NM_001127217.2(SMAD9):c.*948A>G	Likely benign	Primary pulmonary hypertension	0		ClinVar=311868
SMAD9	NA		single nucleotide variant	NM_001127217.2(SMAD9):c.*970G>A	Benign	Primary pulmonary hypertension	0		ClinVar=311867
SMAD9	NA		single nucleotide variant	NM_001127217.2(SMAD9):c.*992G>A	Likely benign	Primary pulmonary hypertension	0		ClinVar=311865
SMAD9	NA		single nucleotide variant	NM_001127217.2(SMAD9):c.*997C>T	Likely benign	Primary pulmonary hypertension	0		ClinVar=311864
SMAD9	NA		single nucleotide variant	NM_001127217.2(SMAD9):c.*1031C>T	Benign	Primary pulmonary hypertension	0		ClinVar=311863
SMAD9	NA		single nucleotide variant	NM_001127217.2(SMAD9):c.*1224A>G	Benign	Primary pulmonary hypertension	0		ClinVar=311860
SMAD9	NA		single nucleotide variant	NM_001127217.2(SMAD9):c.*1379G>T	Benign	Primary pulmonary hypertension	0		ClinVar=311858
SMAD9	NA		single nucleotide variant	NM_001127217.2(SMAD9):c.*1430A>T	Likely benign	Primary pulmonary hypertension	0		ClinVar=311857
SMAD9	NA		single nucleotide variant	NM_001127217.2(SMAD9):c.*1667A>G	Likely benign	Primary pulmonary hypertension	0		ClinVar=311855
SMAD9	NA		single nucleotide variant	NM_001127217.2(SMAD9):c.*1696G>A	Likely benign	Primary pulmonary hypertension	0		ClinVar=311854
SMAD9	NA		single nucleotide variant	NM_001127217.2(SMAD9):c.*2036C>A	Benign	Primary pulmonary hypertension	0		ClinVar=311851
SMAD9	NA		single nucleotide variant	NM_001127217.2(SMAD9):c.*2138C>T	Likely benign	Primary pulmonary hypertension	0		ClinVar=311850
SMAD9	NA		single nucleotide variant	NM_001127217.2(SMAD9):c.*2216G>A	Likely benign	Primary pulmonary hypertension	0		ClinVar=311844
SMAD9	NA		single nucleotide variant	NM_001127217.2(SMAD9):c.*2333A>G	Likely benign	Primary pulmonary hypertension	0		ClinVar=311842
SMAD9	NA		single nucleotide variant	NM_001127217.2(SMAD9):c.*2387A>G	Likely benign	Primary pulmonary hypertension	0		ClinVar=311841
SMAD9	NA		single nucleotide variant	NM_001127217.2(SMAD9):c.*2418C>T	Likely benign	Primary pulmonary hypertension	0		ClinVar=311840
SMAD9	NA		single nucleotide variant	NM_001127217.2(SMAD9):c.*2465T>C	Benign	Primary pulmonary hypertension	0		ClinVar=311839
SMAD9	NA		Deletion	NM_001127217.2(SMAD9):c.*2506_*2511delTAATCT	Benign	Primary pulmonary hypertension	0		ClinVar=311838
SMAD9	NA		single nucleotide variant	NM_001127217.2(SMAD9):c.*2546A>C	Likely benign	Primary pulmonary hypertension	0		ClinVar=311837
SMAD9	NA		single nucleotide variant	NM_001127217.2(SMAD9):c.*2653C>T	Likely benign	Primary pulmonary hypertension	0		ClinVar=311835
SMAD9	NA		single nucleotide variant	NM_001127217.2(SMAD9):c.*2684G>C	Likely benign	Primary pulmonary hypertension	0		ClinVar=311834
SMAD9	NA		single nucleotide variant	NM_001127217.2(SMAD9):c.*2905T>C	Likely benign	Primary pulmonary hypertension	0		ClinVar=311833
SMAD9	NA		Deletion	NM_001127217.2(SMAD9):c.*3171_*3176delAACATT	Benign	Primary pulmonary hypertension	0		ClinVar=311832
SMAD9	NA		single nucleotide variant	NM_001127217.2(SMAD9):c.*3263T>G	Likely benign	Primary pulmonary hypertension	0		ClinVar=311829
SMAD9	NA		Deletion	NM_001127217.2(SMAD9):c.*3354_*3358delGTTTT	Benign	Primary pulmonary hypertension	0		ClinVar=311828
SMAD9	NA		single nucleotide variant	NM_001127217.2(SMAD9):c.*3543A>G	Likely benign	Primary pulmonary hypertension	0		ClinVar=311826
SMAD9	NA		single nucleotide variant	NM_001127217.2(SMAD9):c.*3560T>C	Benign	Primary pulmonary hypertension	0		ClinVar=311825
SMAD9	NA		single nucleotide variant	NM_001127217.2(SMAD9):c.*3562C>T	Benign	Primary pulmonary hypertension	0		ClinVar=311821
SMAD9	NA		Deletion	NM_001127217.2(SMAD9):c.*3572_*3575delCACA	Benign	Primary pulmonary hypertension	0		ClinVar=311817
SMAD9	NA		single nucleotide variant	NM_001127217.2(SMAD9):c.*3599A>T	Benign	Primary pulmonary hypertension	0		ClinVar=311814
SMAD9	NA		single nucleotide variant	NM_001127217.2(SMAD9):c.*3713T>C	Likely benign	Primary pulmonary hypertension	0		ClinVar=311813
SMAD9	NA		Deletion	NM_001127217.2(SMAD9):c.*3756_*3759delTTCT	Likely benign	Primary pulmonary hypertension	0		ClinVar=311811
SMAD9	NA		Deletion	NM_001127217.2(SMAD9):c.*3768_*3770delAAC	Benign	Primary pulmonary hypertension	0		ClinVar=311810
SMAD9	NA		single nucleotide variant	NM_001127217.2(SMAD9):c.*3778C>A	Benign	Primary pulmonary hypertension	0		ClinVar=311809
SMAD9	NA		single nucleotide variant	NM_001127217.2(SMAD9):c.*3835C>A	Likely benign	Primary pulmonary hypertension	0		ClinVar=311807
TBX4	61	16G>A	single nucleotide variant	NM_018488.3(TBX4):c.16G>A (p.Gly6Ser)	Likely benign	Ischiopatellar dysplasia	1		ClinVar=324240
TBX4	62	17G>C	single nucleotide variant	NM_018488.3(TBX4):c.17G>C (p.Gly6Ala)	Benign	Ischiopatellar dysplasia	1		ClinVar=324241
TBX4	149	104C>T	single nucleotide variant	NM_018488.3(TBX4):c.104C>T (p.Ala35Val)	Likely benign	Ischiopatellar dysplasia	1		ClinVar=324243
TBX4	149	c.104C>T (p.A35V)	single nucleotide variant	c.104C>T (p.A35V)	Pathogenic	Primary pulmonary hypertension	1	PMID: 23592887	Manual Annotation
TBX4	217	172G>A	single nucleotide variant	NM_018488.3(TBX4):c.172G>A (p.Ala58Thr)	Likely benign	Ischiopatellar dysplasia	1		ClinVar=324246
TBX4	232	187-15C>T	single nucleotide variant	NM_018488.3(TBX4):c.187-15C>T	Likely benign	Ischiopatellar dysplasia	2		ClinVar=324247
TBX4	274	c.229T>C(**)	single nucleotide variant	c.229T>C(**)	Pathogenic	Primary pulmonary hypertension	2	PMID: 23592887	Manual Annotation
TBX4	274	c.229T>C, p.W77R	single nucleotide variant	c.229T>C, p.W77R	Pathogenic	Primary pulmonary hypertension	2	PMID: 23592887	Manual Annotation
TBX4	294	249G>A	single nucleotide variant	NM_018488.3(TBX4):c.249G>A (p.Ala83=)	Likely benign	Ischiopatellar dysplasia	2		ClinVar=324248
TBX4	321	276T>G	single nucleotide variant	NM_018488.3(TBX4):c.276T>G (p.Ala92=)	Benign	Ischiopatellar dysplasia	2		ClinVar=324249
TBX4	447	402-8G>A	single nucleotide variant	NM_018488.3(TBX4):c.402-8G>A	Benign	Ischiopatellar dysplasia	4		ClinVar=261034
TBX4	667	622G>A	single nucleotide variant	NM_018488.3(TBX4):c.622G>A (p.Gly208Ser)	Likely benign	Ischiopatellar dysplasia	5		ClinVar=324251
TBX4	748	703-8C>T	single nucleotide variant	NM_018488.3(TBX4):c.703-8C>T	Likely benign	Ischiopatellar dysplasia	6		ClinVar=324252
TBX4	966	921C>T	single nucleotide variant	NM_018488.3(TBX4):c.921C>T (p.Asn307=)	Likely benign	Ischiopatellar dysplasia	7		ClinVar=324255
TBX4	977	932C>T	single nucleotide variant	NM_018488.3(TBX4):c.932C>T (p.Ser311Leu)	Likely benign	Ischiopatellar dysplasia	7		ClinVar=324256
TBX4	986	941C>T	single nucleotide variant	NM_018488.3(TBX4):c.941C>T (p.Ala314Val)	Benign	Ischiopatellar dysplasia	7		ClinVar=261035
TBX4	1050	1005C>T	single nucleotide variant	NM_018488.3(TBX4):c.1005C>T (p.His335=)	Likely benign	Ischiopatellar dysplasia	7		ClinVar=324257
TBX4	1128	1083G>C	single nucleotide variant	NM_018488.3(TBX4):c.1083G>C (p.Val361=)	Likely benign	Ischiopatellar dysplasia	8		ClinVar=324259
TBX4	1200	1155G>A	single nucleotide variant	NM_018488.3(TBX4):c.1155G>A (p.Glu385=)	Likely benign	Ischiopatellar dysplasia	8		ClinVar=324260
TBX4	1259	1214C>G	single nucleotide variant	NM_018488.3(TBX4):c.1214C>G (p.Ser405Cys)	Likely benign	Ischiopatellar dysplasia	8		ClinVar=324261
TBX4	1269	1224C>T	single nucleotide variant	NM_018488.3(TBX4):c.1224C>T (p.Asp408=)	Benign	Ischiopatellar dysplasia	8		ClinVar=324262
TBX4	1491	1446C>T	single nucleotide variant	NM_018488.3(TBX4):c.1446C>T (p.Val482=)	Benign	Ischiopatellar dysplasia	8		ClinVar=261033
TBX4	1557	1512G>A	single nucleotide variant	NM_018488.3(TBX4):c.1512G>A (p.Lys504=)	Likely benign	Ischiopatellar dysplasia	8		ClinVar=324263
TBX4	1566	1521G>A	single nucleotide variant	NM_018488.3(TBX4):c.1521G>A (p.Ser507=)	Likely benign	Ischiopatellar dysplasia	8		ClinVar=324264
TBX4	1665	1620G>A	single nucleotide variant	NM_018488.3(TBX4):c.1620G>A (p.Glu540=)	Likely benign	Ischiopatellar dysplasia	8		ClinVar=324265
TBX4	NA		single nucleotide variant	NM_018488.3(TBX4):c.*766A>C	Likely benign	Ischiopatellar dysplasia	0		ClinVar=324286
TBX4	NA		single nucleotide variant	NM_018488.3(TBX4):c.*722C>A	Likely benign	Ischiopatellar dysplasia	0		ClinVar=324285
TBX4	NA		single nucleotide variant	NM_018488.3(TBX4):c.*707G>T	Benign	Ischiopatellar dysplasia	0		ClinVar=324284
TBX4	NA		single nucleotide variant	NM_018488.3(TBX4):c.*327G>A	Benign	Ischiopatellar dysplasia	0		ClinVar=324280
TBX4	NA		single nucleotide variant	NM_018488.3(TBX4):c.*313A>C	Likely benign	Ischiopatellar dysplasia	0		ClinVar=324279
TBX4	NA		single nucleotide variant	NM_018488.3(TBX4):c.*138A>G	Benign	Ischiopatellar dysplasia	0		ClinVar=324277
TBX4	NA		single nucleotide variant	NM_018488.3(TBX4):c.*99T>A	Likely benign	Ischiopatellar dysplasia	0		ClinVar=324274
TBX4	NA		Duplication	NM_018488.3(TBX4):c.*136_*137dupGT	Benign	Ischiopatellar dysplasia	0		ClinVar=324268
TBX4	NA		single nucleotide variant	NM_018488.3(TBX4):c.*25G>A	Likely benign	Ischiopatellar dysplasia	0		ClinVar=324267
TBX4	NA		single nucleotide variant	NM_018488.3(TBX4):c.*7C>T	Likely benign	Ischiopatellar dysplasia	0		ClinVar=324266
THBS1	1316	c.1137G>A p.Asp362Asn	single nucleotide variant	c.1137G>A p.Asp362Asn	Pathogenic	Primary pulmonary hypertension	8	PMID: 22198906	Manual Annotation
THBS1	1469	1290G>A	single nucleotide variant	NM_003246.3(THBS1):c.1290G>A (p.Lys430=)	Benign	not specified	8		ClinVar=403534
THBS1	1589	1410C>T	single nucleotide variant	NM_003246.3(THBS1):c.1410C>T (p.Asn470=)	Benign	not specified	9		ClinVar=403535
THBS1	1742	1563C>T	single nucleotide variant	NM_003246.3(THBS1):c.1563C>T (p.Asn521=)	Benign	not specified	10		ClinVar=403536
THBS1	1746	1567A>G	single nucleotide variant	NM_003246.3(THBS1):c.1567A>G (p.Thr523Ala)	Benign	not specified	10		ClinVar=403537
THBS1	2105	c.1926+255G>A(Intron)	single nucleotide variant	c.1926+255G>A(Intron)	Pathogenic	Primary pulmonary hypertension	12	PMID: 22198906	Manual Annotation
THBS1	3047	2868T>C	single nucleotide variant	NM_003246.3(THBS1):c.2868T>C (p.Asp956=)	Benign	not specified	18		ClinVar=403538
TOPBP1	1057	c.925C>T p.Arg309Cys	single nucleotide variant	c.925C>T p.Arg309Cys	Pathogenic	Primary pulmonary hypertension	8	PMID: 24702692	Manual Annotation
TOPBP1	2582	c.2450C>T p.Ser817Leu	single nucleotide variant	c.2450C>T p.Ser817Leu	Pathogenic	Primary pulmonary hypertension	14	PMID: 24702692	Manual Annotation
TOPBP1	3257	c.3125A>G p.Asn1042Ser	single nucleotide variant	c.3125A>G p.Asn1042Ser	Pathogenic	Primary pulmonary hypertension	19	PMID: 24702692	Manual Annotation
TRPC6	64	-361A>T	single nucleotide variant	NM_004621.5(TRPC6):c.-361A>T	Benign	Focal segmental glomerulosclerosis	0		ClinVar=301926
TRPC6	65	-360T>C	single nucleotide variant	NM_004621.5(TRPC6):c.-360T>C	Likely benign	Focal segmental glomerulosclerosis	0		ClinVar=301925
TRPC6	82	-343C>G	single nucleotide variant	NM_004621.5(TRPC6):c.-343C>G	Likely benign	Focal segmental glomerulosclerosis	0		ClinVar=301923
TRPC6	171	-254C>G	single nucleotide variant	NM_004621.5(TRPC6):c.-254C>G	Benign	Focal segmental glomerulosclerosis	0	PMID:19380626	ClinVar=301920
TRPC6	207	-218C>T	single nucleotide variant	NM_004621.5(TRPC6):c.-218C>T	Benign	Focal segmental glomerulosclerosis	0		ClinVar=301918
TRPC6	415	-10C>A	single nucleotide variant	NM_004621.5(TRPC6):c.-10C>A	Likely benign	Focal segmental glomerulosclerosis	0		ClinVar=301914
TRPC6	426	c.1-361A>T	single nucleotide variant	c.1-361A>T	Pathogenic	Primary pulmonary hypertension	1	PMID: 19380626	Manual Annotation
TRPC6	426	c.1-218C>T	single nucleotide variant	c.1-218C>T	Pathogenic	Primary pulmonary hypertension	1	PMID: 19380626	Manual Annotation
TRPC6	468	43C>T	single nucleotide variant	NM_004621.5(TRPC6):c.43C>T (p.Pro15Ser)	Benign	Focal segmental glomerulosclerosis	1		ClinVar=259463
TRPC6	596	171-20A>G	single nucleotide variant	NM_004621.5(TRPC6):c.171-20A>G	Benign	not specified	2		ClinVar=259456
TRPC6	597	172C>T	single nucleotide variant	NM_004621.5(TRPC6):c.172C>T (p.Arg58Trp)	Likely benign	Focal segmental glomerulosclerosis	2		ClinVar=301913
TRPC6	679	c. 254 C>G	single nucleotide variant	c. 254 C>G	Pathogenic	Primary pulmonary hypertension	2	PMID: 19380626	Manual Annotation
TRPC6	761	336A>C	single nucleotide variant	NM_004621.5(TRPC6):c.336A>C (p.Pro112=)	Likely benign	Focal segmental glomerulosclerosis	2		ClinVar=301911
TRPC6	1313	888G>A	single nucleotide variant	NM_004621.5(TRPC6):c.888G>A (p.Thr296=)	Likely benign	not specified	2		ClinVar=259464
TRPC6	1636	1211C>T	single nucleotide variant	NM_004621.5(TRPC6):c.1211C>T (p.Ala404Val)	Benign	Focal segmental glomerulosclerosis	4		ClinVar=259454
TRPC6	1763	1338C>T	single nucleotide variant	NM_004621.5(TRPC6):c.1338C>T (p.His446=)	Likely benign	Focal segmental glomerulosclerosis	5		ClinVar=301908
TRPC6	1769	1344C>A	single nucleotide variant	NM_004621.5(TRPC6):c.1344C>A (p.Ala448=)	Likely benign	Focal segmental glomerulosclerosis	5		ClinVar=301907
TRPC6	2102	1677C>T	single nucleotide variant	NM_004621.5(TRPC6):c.1677C>T (p.Asp559=)	Likely benign	Focal segmental glomerulosclerosis	6		ClinVar=301906
TRPC6	2108	1683T>C	single nucleotide variant	NM_004621.5(TRPC6):c.1683T>C (p.Asn561=)	Benign	Focal segmental glomerulosclerosis	6		ClinVar=259455
TRPC6	2243	1818T>C	single nucleotide variant	NM_004621.5(TRPC6):c.1818T>C (p.Ser606=)	Likely benign	Focal segmental glomerulosclerosis	7		ClinVar=259457
TRPC6	2513	2088C>T	single nucleotide variant	NM_004621.5(TRPC6):c.2088C>T (p.Asn696=)	Likely benign	Focal segmental glomerulosclerosis	8		ClinVar=301902
TRPC6	2540	2115C>T	single nucleotide variant	NM_004621.5(TRPC6):c.2115C>T (p.Tyr705=)	Benign	Focal segmental glomerulosclerosis	8		ClinVar=259458
TRPC6	2567	2142G>A	single nucleotide variant	NM_004621.5(TRPC6):c.2142G>A (p.Thr714=)	Likely benign	Focal segmental glomerulosclerosis	8		ClinVar=259459
TRPC6	2954	2529C>T	single nucleotide variant	NM_004621.5(TRPC6):c.2529C>T (p.Phe843=)	Benign	Focal segmental glomerulosclerosis	11		ClinVar=259460
TRPC6	3070	2645-22_2645-20delCTT	Deletion	NM_004621.5(TRPC6):c.2645-22_2645-20delCTT	Benign	not specified	13		ClinVar=259461
TRPC6	3137	2712G>A	single nucleotide variant	NM_004621.5(TRPC6):c.2712G>A (p.Gln904=)	Benign	Focal segmental glomerulosclerosis	13		ClinVar=259462
TRPC6	3195	2770C>T	single nucleotide variant	NM_004621.5(TRPC6):c.2770C>T (p.Pro924Ser)	Likely benign	Focal segmental glomerulosclerosis	13		ClinVar=301898
TRPC6	NA		single nucleotide variant	NM_004621.5(TRPC6):c.*9C>T	Likely benign	Focal segmental glomerulosclerosis	0		ClinVar=301897
TRPC6	NA		single nucleotide variant	NM_004621.5(TRPC6):c.*13C>T	Likely benign	Focal segmental glomerulosclerosis	0		ClinVar=301896
TRPC6	NA		Deletion	NM_004621.5(TRPC6):c.*33delT	Likely benign	Focal segmental glomerulosclerosis	0		ClinVar=301895
TRPC6	NA		single nucleotide variant	NM_004621.5(TRPC6):c.*40T>G	Likely benign	Focal segmental glomerulosclerosis	0		ClinVar=301894
TRPC6	NA		single nucleotide variant	NM_004621.5(TRPC6):c.*175A>C	Likely benign	Focal segmental glomerulosclerosis	0		ClinVar=301893
TRPC6	NA		single nucleotide variant	NM_004621.5(TRPC6):c.*314C>G	Likely benign	Focal segmental glomerulosclerosis	0		ClinVar=301892
TRPC6	NA		single nucleotide variant	NM_004621.5(TRPC6):c.*336C>T	Likely benign	Focal segmental glomerulosclerosis	0		ClinVar=301891
TRPC6	NA		single nucleotide variant	NM_004621.5(TRPC6):c.*337G>A	Likely benign	Focal segmental glomerulosclerosis	0		ClinVar=301890
TRPC6	NA		Duplication	NM_004621.5(TRPC6):c.*509_*512dupCTTA	Likely benign	Focal segmental glomerulosclerosis	0		ClinVar=301889
TRPC6	NA		single nucleotide variant	NM_004621.5(TRPC6):c.*530T>C	Likely benign	Focal segmental glomerulosclerosis	0		ClinVar=301888
TRPC6	NA		single nucleotide variant	NM_004621.5(TRPC6):c.*553T>G	Benign	Focal segmental glomerulosclerosis	0		ClinVar=301887
TRPC6	NA		single nucleotide variant	NM_004621.5(TRPC6):c.*668G>A	Likely benign	Focal segmental glomerulosclerosis	0		ClinVar=301885
TRPC6	NA		Insertion	NM_004621.5(TRPC6):c.*710_*711insTTTA	Benign	Focal segmental glomerulosclerosis	0		ClinVar=301884
TRPC6	NA		single nucleotide variant	NM_004621.5(TRPC6):c.*792G>A	Likely benign	Focal segmental glomerulosclerosis	0		ClinVar=301883
TRPC6	NA		single nucleotide variant	NM_004621.5(TRPC6):c.*970A>G	Likely benign	Focal segmental glomerulosclerosis	0		ClinVar=301881
TRPC6	NA		single nucleotide variant	NM_004621.5(TRPC6):c.*1038T>G	Likely benign	Focal segmental glomerulosclerosis	0		ClinVar=301879
TRPC6	NA		single nucleotide variant	NM_004621.5(TRPC6):c.*1089C>T	Likely benign	Focal segmental glomerulosclerosis	0		ClinVar=301878
